# Supplementary material for: Time-Dependent Effect of Sciatic Nerve Injury on Rat Plasma Lipidome
Source: MDPI journal article supplement (doi:10.3390/ijms232415544), 2022-12-08
Supplement: s1 [file s1]

# Time-Dependent Effect of Sciatic Nerve Injury on Rat Plasma Lipidome

Dmitry Senko <sup>1</sup>, Anna Gorovaya <sup>1</sup>, Elena Stekolshchikova <sup>1</sup>, Nickolay Anikanov <sup>1</sup>, Artur Fedianin <sup>2</sup>, Maxim Baltin <sup>2</sup>, Olga Efimova <sup>1</sup>, Daria Petrova <sup>1</sup>, Tatyana Baltina <sup>2</sup>, Mikhail A. Lebedev <sup>3,4</sup>, Philipp Khaitovich <sup>1</sup> and Anna Tkachev <sup>1,\*</sup>

<sup>1</sup> Vladimir Zelman Center for Neurobiology and Brain Rehabilitation, Skolkovo Institute of Science and Technology, 121205 Moscow, Russia

<sup>2</sup> Research Laboratory of Mechanobiology, Institute of Fundamental Medicine and Biology, Kazan Federal University, 420008 Kazan, Russia

<sup>3</sup> Faculty of Mechanics and Mathematics, Moscow State University, 119991, Moscow, Russia

<sup>4</sup> Laboratory of Neurotechnology, I. M. Sechenov Institute of Evolutionary Physiology and Biochemistry, 194223 Saint-Petersburg, Russia

\* Correspondence: a.tkachev@skoltech.ru

## Content:

**Figure S1.** Analysis of 106 NI-associated lipids at the w0 and w2 time points.

**Figure S2.** Changes in lipid abundances from the first time point to the later ones for the NI and CL groups, separately.

**Figure S3.** Effect of fatty acid composition on triglyceride abundances in NI at w5.

**Figure S4.** Additive effect of fatty acid residues, shown separately by lipid class.

**Table S1.** MS-DIAL parameters of data processing

**Table S2.** Full list annotated lipids.

**Table S3.** List of *p*-values and log2 fold changes at the three time points for 377 lipids.

**Table S4.** Enrichment analysis results for lipid classes and fatty acid residues.

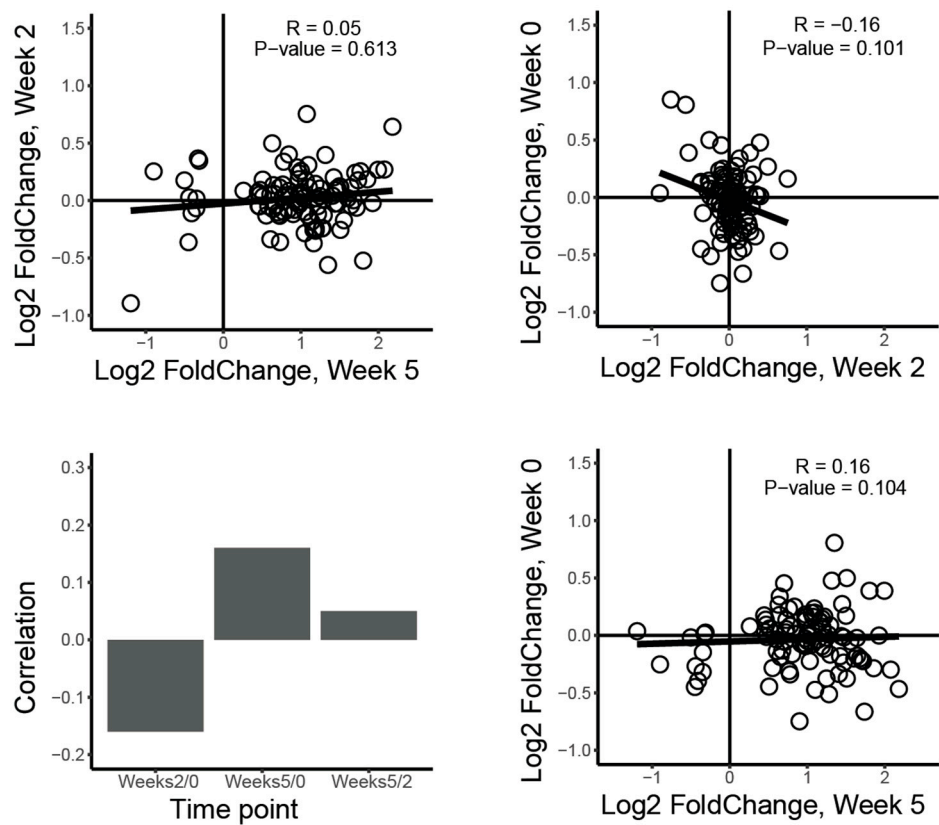

**Figure S1.** Analysis of 106 NI-associated lipids at the w0 and w2 time points. Here are shown the scatter plots of log2 fold changes between NI and CL at the different time points. The Pearson correlation coefficients and corresponding  $p$ -values are included on the plots. No evident alteration trend correlated with w5 alterations was found at w0 and w2.

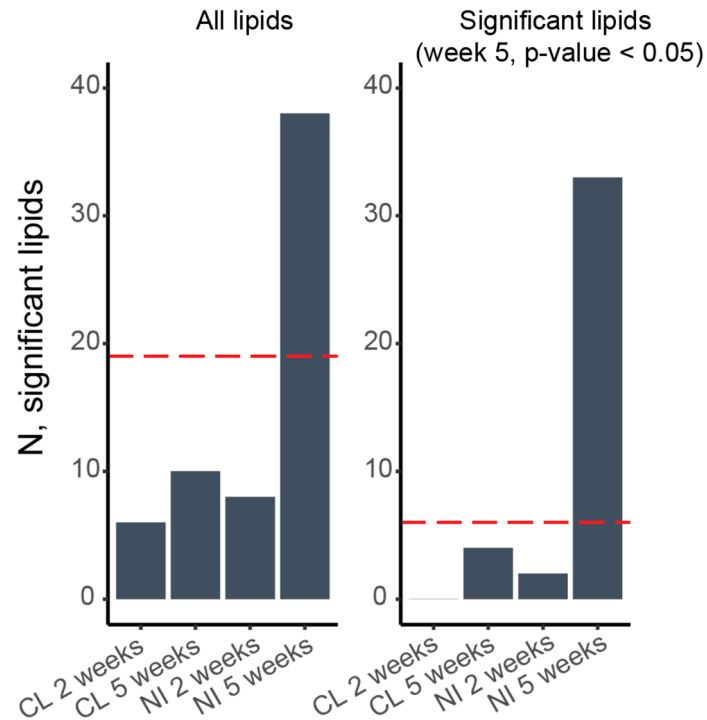

**Figure S2.** Changes in lipid abundances from the first time point to the later ones for the NI and CL groups, separately. Here are shown the number of lipids with significant (paired t-test, nominal  $p$ -value < 0.05) changes in abundance between weeks 0/2 or 0/5 for CL and NI groups. The analysis was performed for all lipids (left) and only NI-associated lipids (right). The red line indicates the expected number of significant lipids under a uniform  $p$ -value distribution (total number of lipids  $\times$  0.05). Changes in the NI group between week 0 and 5 were most pronounced among all other comparisons.

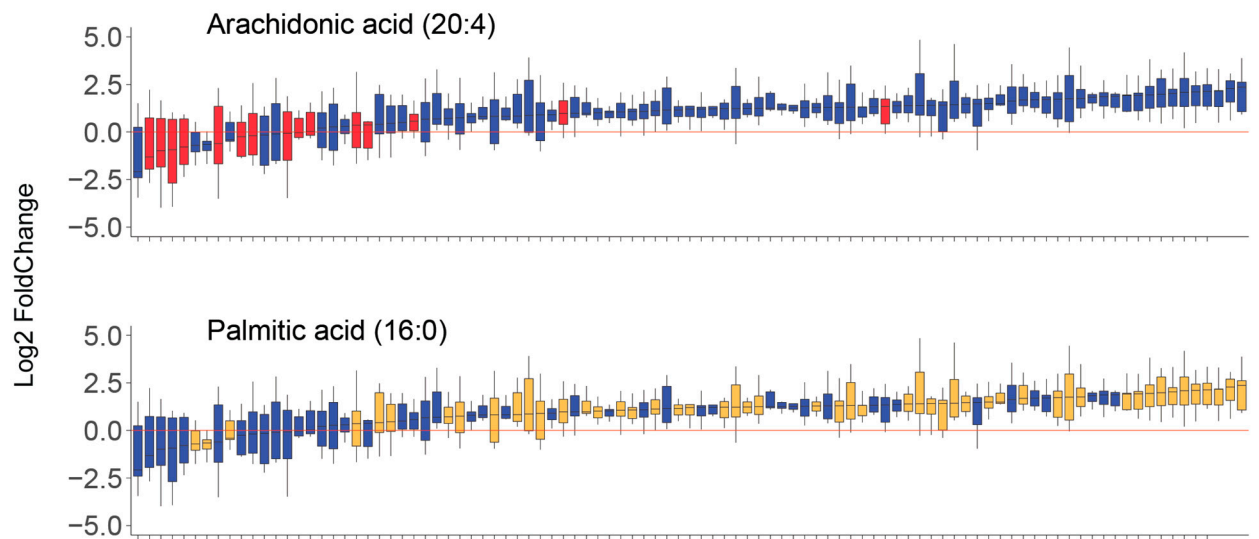

**Figure S3.** Effect of fatty acid composition on triglyceride abundances in NI at w5. For each triglyceride, the boxplot indicates the distribution of the differences between log2 abundances in NI and the mean log2 abundance in CL. TG features are ordered by boxplot medians. Top: TG containing arachidonic acid are colored in red. Bottom: TG containing palmitic acid are colored in yellow.

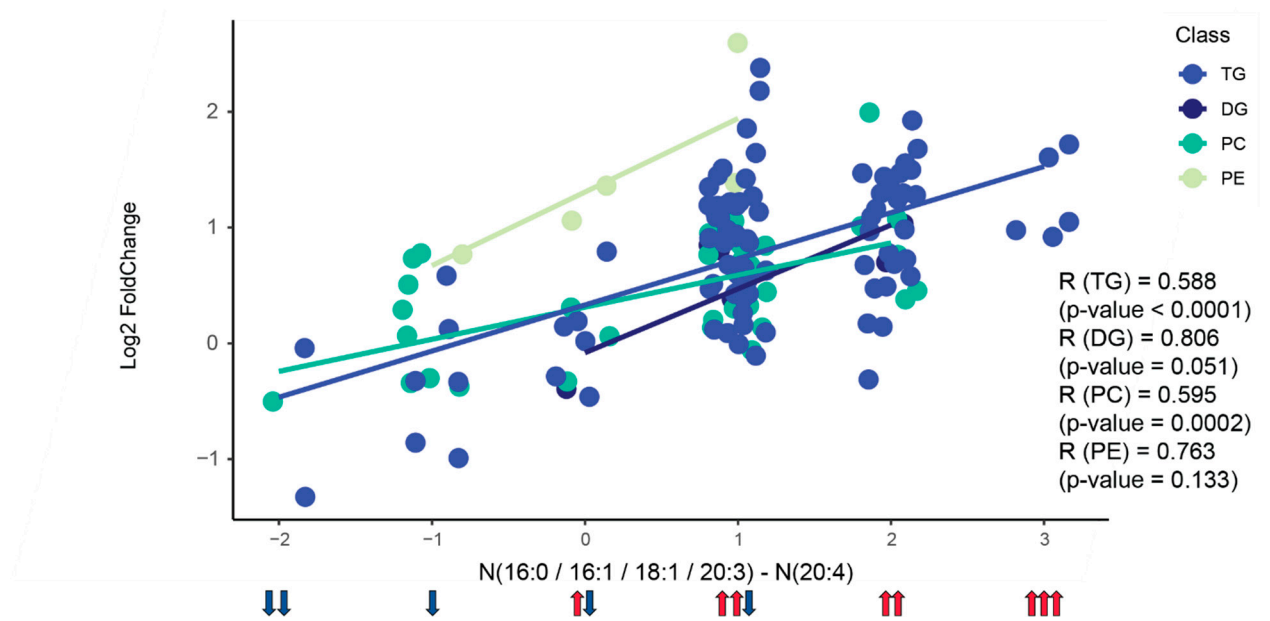

**Figure S4.** Additive effect of fatty acid residues, shown separately by lipid class. For a particular lipid, the number of fatty acids with negative direction of effect in NI (20:4) is subtracted from the number of fatty acids with positive direction (16:0, 16:1, 18:1, or 20:3), which is indicated on the  $x$ -axis, while its log2 fold changes between NI and CL is indicated on the  $y$ -axis. All lipid classes with 2 or 3 fatty acid residues (excluding PI,  $n = 2$ ), were considered in this analysis: PC, PE, DG, TG. Moreover, only lipids including at least one of the affected fatty acids (16:0, 16:1, 18:1, 20:3, 20:4) are included in the plot. For each lipid class separately, a linear regression was used to visualize the relationship, with correlation coefficient and corresponding  $p$ -value marked on the plot.

**Table S1.** MS-DIAL parameters of data processing.

|                                            |                                     |       |
|--------------------------------------------|-------------------------------------|-------|
| <b>MS-DIAL ver. 4.70</b>                   |                                     |       |
| #Project                                   |                                     |       |
| MS1 Data type                              | Profile                             |       |
| MS2 Data type                              | Profile                             |       |
| Ion mode                                   | Positive/Negative                   |       |
| Target                                     | Lipidomics                          |       |
| Mode                                       | ddMSMS                              |       |
| #Data collection parameters                |                                     |       |
| Retention time begin                       |                                     | 1     |
| Retention time end                         |                                     | 17    |
| Mass range begin                           |                                     | 200   |
| Mass range end                             |                                     | 1200  |
| MS2 mass range begin                       |                                     | 50    |
| MS2 mass range end                         |                                     | 1200  |
| #Centroid parameters                       |                                     |       |
| MS1 tolerance                              |                                     | 0.01  |
| MS2 tolerance                              |                                     | 0.025 |
| #Isotope recognition                       |                                     |       |
| Maximum charged number                     |                                     | 2     |
| #Data processing                           |                                     |       |
| Number of threads                          |                                     | 5     |
| #Peak detection parameters                 |                                     |       |
| Smoothing method                           | LinearWeightedMovingAverage         |       |
| Smoothing level                            |                                     | 3     |
| Minimum peak width                         |                                     | 5     |
| Minimum peak height                        | 10000 (positive) / 20000 (negative) |       |
| #Peak spotting parameters                  |                                     |       |
| Mass slice width                           |                                     | 0.1   |
| #Deconvolution parameters                  |                                     |       |
| Sigma window value                         |                                     | 0.5   |
| MS2Dec amplitude cut off                   |                                     | 0     |
| Exclude after precursor                    | True                                |       |
| Keep isotope until                         |                                     | 0.5   |
| Keep original precursor isotopes           | False                               |       |
| #MSP file and MS/MS identification setting |                                     |       |
| MSP file                                   | LipidMsmsBinaryDB-VS68-FiehnO       |       |
| Retention time tolerance                   | -                                   |       |
| Accurate mass tolerance (MS1)              |                                     | 0.01  |
| Accurate mass tolerance (MS2)              |                                     | 0.05  |
| Identification score cut off               |                                     | 80    |
| Using retention time for scoring           | False                               |       |
| Using retention time for filtering         | False                               |       |
| #Selected lipid types                      |                                     |       |
| All                                        |                                     |       |
| #Advanced setting for identification       |                                     |       |
| Relative abundance cut off                 |                                     | 0     |

|                                                         |       |
|---------------------------------------------------------|-------|
| Top candidate report                                    | False |
| #Adduct ion setting<br>[M+H] <sup>+</sup>               |       |
| #Alignment parameters setting                           |       |
| Retention time tolerance                                | 0.1   |
| MS1 tolerance                                           | 0.015 |
| Retention time factor                                   | 0.5   |
| MS1 factor                                              | 0.5   |
| Peak count filter                                       | 75    |
| N% detected in at least one group                       | 0     |
| Remove feature based on peak height fold-change         | False |
| Sample max / blank average                              | 5     |
| Sample average / blank average                          | 5     |
| Keep identified and annotated metabolites               | True  |
| Keep removable features and assign the tag for checking | True  |
| Gap filling by compulsion                               | True  |
| #Tracking of isotope labels                             |       |
| Tracking of isotopic labels                             | FALSE |
| #Ion mobility                                           |       |
| Ion mobility data                                       | FALSE |

**Table S2.** Full list annotated lipids. RT indicates retention time in minutes, m/z indicates mass-to-charge ratio. Lipid nomenclature was kept as reported by MS-DIAL.

| Lipid                        | Class | Category      | Adduct                               | RT     | m/z       |
|------------------------------|-------|---------------|--------------------------------------|--------|-----------|
| CAR 16:0                     | CAR   | Fatty acyls   | [M+H] <sup>+</sup>                   | 2.874  | 400.34119 |
| CAR 16:1                     | CAR   | Fatty acyls   | [M+H] <sup>+</sup>                   | 2.352  | 398.3259  |
| CAR 18:0                     | CAR   | Fatty acyls   | [M+H] <sup>+</sup>                   | 3.583  | 428.37402 |
| CAR 18:1                     | CAR   | Fatty acyls   | [M+H] <sup>+</sup>                   | 3.098  | 426.35651 |
| CE 18:1                      | CE    | Sterol lipids | [M+NH <sub>4</sub> ] <sup>+</sup>    | 15.564 | 668.63318 |
| CE 18:2                      | CE    | Sterol lipids | [M+NH <sub>4</sub> ] <sup>+</sup>    | 15.268 | 666.61816 |
| CE 18:3                      | CE    | Sterol lipids | [M+NH <sub>4</sub> ] <sup>+</sup>    | 14.949 | 664.60156 |
| CE 20:4                      | CE    | Sterol lipids | [M+NH <sub>4</sub> ] <sup>+</sup>    | 15.061 | 690.61951 |
| CE 22:5                      | CE    | Sterol lipids | [M+NH <sub>4</sub> ] <sup>+</sup>    | 15.083 | 716.63367 |
| CE 22:6                      | CE    | Sterol lipids | [M+NH <sub>4</sub> ] <sup>+</sup>    | 14.842 | 714.61835 |
| Cer 34:1;2O Cer 18:1;2O/16:0 | Cer   | Sphingolipids | [M+H-H <sub>2</sub> O] <sup>+</sup>  | 7.323  | 520.50739 |
| Cer 40:1;2O Cer 18:1;2O/22:0 | Cer   | Sphingolipids | [M+H-H <sub>2</sub> O] <sup>+</sup>  | 11.354 | 604.60071 |
| Cer 41:1;2O Cer 18:1;2O/23:0 | Cer   | Sphingolipids | [M+CH <sub>3</sub> COO] <sup>-</sup> | 13.713 | 618.61993 |
| Cer 42:1;2O Cer 18:1;2O/24:0 | Cer   | Sphingolipids | [M+H-H <sub>2</sub> O] <sup>+</sup>  | 13.099 | 632.63452 |
| Cer 42:2;2O Cer 18:1;2O/24:1 | Cer   | Sphingolipids | [M+H-H <sub>2</sub> O] <sup>+</sup>  | 11.407 | 630.61908 |
| Cer 42:3;2O Cer 18:1;2O/24:2 | Cer   | Sphingolipids | [M+H] <sup>+</sup>                   | 10.149 | 646.61139 |
| Cer 43:1;2O Cer 18:1;2O/25:0 | Cer   | Sphingolipids | [M+H-H <sub>2</sub> O] <sup>+</sup>  | 13.72  | 646.65045 |
| Cer 44:1;2O Cer 18:1;2O/26:0 | Cer   | Sphingolipids | [M+H] <sup>+</sup>                   | 14.161 | 678.67511 |
| CoQ9                         | Other | Other         | [M+H] <sup>+</sup>                   | 14.194 | 795.62512 |
| DG 32:1                      | DG    | Glycerolipids | [M+Na] <sup>+</sup>                  | 8.514  | 589.48102 |
| DG 32:3                      | DG    | Glycerolipids | [M+Na] <sup>+</sup>                  | 7.67   | 585.44458 |
| DG 34:0                      | DG    | Glycerolipids | [M+Na] <sup>+</sup>                  | 10.888 | 619.52692 |
| DG 34:0                      | DG    | Glycerolipids | [M+Na] <sup>+</sup>                  | 11.029 | 619.52704 |
| DG 34:1 DG 16:0_18:1         | DG    | Glycerolipids | [M+NH <sub>4</sub> ] <sup>+</sup>    | 9.811  | 612.55798 |
| DG 34:2 DG 16:0_18:2         | DG    | Glycerolipids | [M+NH <sub>4</sub> ] <sup>+</sup>    | 8.754  | 610.54199 |
| DG 34:3 DG 16:1_18:2         | DG    | Glycerolipids | [M+NH <sub>4</sub> ] <sup>+</sup>    | 7.845  | 608.52588 |
| DG 36:2 DG 18:1_18:1         | DG    | Glycerolipids | [M+NH <sub>4</sub> ] <sup>+</sup>    | 10.076 | 638.57361 |
| DG 36:3 DG 18:1_18:2         | DG    | Glycerolipids | [M+NH <sub>4</sub> ] <sup>+</sup>    | 8.998  | 636.5578  |
| DG 36:4                      | DG    | Glycerolipids | [M+Na] <sup>+</sup>                  | 8.503  | 639.49689 |
| DG 36:4 DG 18:2_18:2         | DG    | Glycerolipids | [M+NH <sub>4</sub> ] <sup>+</sup>    | 8.055  | 634.54053 |
| DG 36:5 DG 18:2_18:3         | DG    | Glycerolipids | [M+NH <sub>4</sub> ] <sup>+</sup>    | 7.467  | 632.52588 |
| DG 37:6                      | DG    | Glycerolipids | [M+Na] <sup>+</sup>                  | 7.764  | 649.47607 |
| DG 37:7                      | DG    | Glycerolipids | [M+Na] <sup>+</sup>                  | 12.363 | 647.45929 |
| DG 37:7                      | DG    | Glycerolipids | [M+Na] <sup>+</sup>                  | 5.359  | 647.46216 |
| DG 38:2                      | DG    | Glycerolipids | [M+Na] <sup>+</sup>                  | 15.268 | 671.57373 |
| DG 38:4                      | DG    | Glycerolipids | [M+Na] <sup>+</sup>                  | 9.717  | 667.52722 |
| DG 38:5 DG 18:1_20:4         | DG    | Glycerolipids | [M+NH <sub>4</sub> ] <sup>+</sup>    | 8.774  | 660.55737 |
| DG 38:6                      | DG    | Glycerolipids | [M+Na] <sup>+</sup>                  | 7.861  | 663.49683 |
| DG 40:2                      | DG    | Glycerolipids | [M+Na] <sup>+</sup>                  | 13.247 | 699.59332 |
| DG 40:4                      | DG    | Glycerolipids | [M+Na] <sup>+</sup>                  | 15.062 | 695.57367 |
| DG 40:5                      | DG    | Glycerolipids | [M+Na] <sup>+</sup>                  | 9.735  | 693.54358 |
| DG 40:5                      | DG    | Glycerolipids | [M+Na] <sup>+</sup>                  | 14.708 | 693.55902 |



|           |    |               |                     |        |           |
|-----------|----|---------------|---------------------|--------|-----------|
| DG 40:6   | DG | Glycerolipids | [M+Na] <sup>+</sup> | 9.266  | 691.52759 |
| DG 40:8   | DG | Glycerolipids | [M+Na] <sup>+</sup> | 11.449 | 687.49689 |
| DG 42:4   | DG | Glycerolipids | [M+Na] <sup>+</sup> | 15.401 | 723.60431 |
| DG 42:5   | DG | Glycerolipids | [M+Na] <sup>+</sup> | 15.156 | 721.58972 |
| DG 42:6   | DG | Glycerolipids | [M+Na] <sup>+</sup> | 14.842 | 719.57404 |
| DG 43:6   | DG | Glycerolipids | [M+Na] <sup>+</sup> | 14.333 | 733.57483 |
| DG 44:9   | DG | Glycerolipids | [M+Na] <sup>+</sup> | 6.174  | 741.52887 |
| DG 49:6   | DG | Glycerolipids | [M+Na] <sup>+</sup> | 15.461 | 817.66711 |
| DG 49:8   | DG | Glycerolipids | [M+Na] <sup>+</sup> | 14.94  | 813.63739 |
| DG 51:10  | DG | Glycerolipids | [M+Na] <sup>+</sup> | 14.669 | 837.63556 |
| DG 51:6   | DG | Glycerolipids | [M+Na] <sup>+</sup> | 15.7   | 845.69781 |
| DG 51:7   | DG | Glycerolipids | [M+Na] <sup>+</sup> | 15.497 | 843.68414 |
| DG 51:8   | DG | Glycerolipids | [M+Na] <sup>+</sup> | 15.263 | 841.66589 |
| DG 51:9   | DG | Glycerolipids | [M+Na] <sup>+</sup> | 14.995 | 839.65198 |
| DG 52:7   | DG | Glycerolipids | [M+Na] <sup>+</sup> | 15.621 | 857.69855 |
| FA 14:0   | FA | Fatty acyls   | [M-H] <sup>-</sup>  | 3.475  | 227.2014  |
| FA 14:1   | FA | Fatty acyls   | [M-H] <sup>-</sup>  | 2.924  | 225.18555 |
| FA 15:0   | FA | Fatty acyls   | [M-H] <sup>-</sup>  | 3.849  | 241.2168  |
| FA 16:0   | FA | Fatty acyls   | [M-H] <sup>-</sup>  | 4.192  | 255.23264 |
| FA 16:1   | FA | Fatty acyls   | [M-H] <sup>-</sup>  | 3.693  | 253.21706 |
| FA 17:0   | FA | Fatty acyls   | [M-H] <sup>-</sup>  | 4.512  | 269.2486  |
| FA 17:1   | FA | Fatty acyls   | [M-H] <sup>-</sup>  | 4.039  | 267.23315 |
| FA 18:0   | FA | Fatty acyls   | [M-H] <sup>-</sup>  | 4.812  | 283.26382 |
| FA 18:1   | FA | Fatty acyls   | [M-H] <sup>-</sup>  | 4.364  | 281.24863 |
| FA 18:2   | FA | Fatty acyls   | [M-H] <sup>-</sup>  | 3.907  | 279.23309 |
| FA 18:3   | FA | Fatty acyls   | [M-H] <sup>-</sup>  | 3.469  | 277.21722 |
| FA 18:3   | FA | Fatty acyls   | [M-H] <sup>-</sup>  | 3.547  | 277.21722 |
| FA 19:1   | FA | Fatty acyls   | [M-H] <sup>-</sup>  | 4.653  | 295.26395 |
| FA 20:0   | FA | Fatty acyls   | [M-H] <sup>-</sup>  | 5.44   | 311.29605 |
| FA 20:1   | FA | Fatty acyls   | [M-H] <sup>-</sup>  | 4.912  | 309.27969 |
| FA 20:2   | FA | Fatty acyls   | [M-H] <sup>-</sup>  | 4.506  | 307.26425 |
| FA 20:3   | FA | Fatty acyls   | [M-H] <sup>-</sup>  | 4.28   | 305.24866 |
| FA 20:4   | FA | Fatty acyls   | [M-H] <sup>-</sup>  | 3.867  | 303.23257 |
| FA 20:4;O | FA | Fatty acyls   | [M-H] <sup>-</sup>  | 2.508  | 319.22797 |
| FA 20:5   | FA | Fatty acyls   | [M-H] <sup>-</sup>  | 3.44   | 301.21756 |
| FA 21:0   | FA | Fatty acyls   | [M-H] <sup>-</sup>  | 5.812  | 325.31146 |
| FA 22:0   | FA | Fatty acyls   | [M-H] <sup>-</sup>  | 6.248  | 339.3269  |
| FA 22:4   | FA | Fatty acyls   | [M-H] <sup>-</sup>  | 4.365  | 331.26465 |
| FA 22:5   | FA | Fatty acyls   | [M-H] <sup>-</sup>  | 3.995  | 329.24844 |
| FA 22:5   | FA | Fatty acyls   | [M-H] <sup>-</sup>  | 4.128  | 329.24893 |
| FA 22:6   | FA | Fatty acyls   | [M-H] <sup>-</sup>  | 3.743  | 327.23297 |
| FA 24:0   | FA | Fatty acyls   | [M-H] <sup>-</sup>  | 7.275  | 367.35779 |
| FA 24:1   | FA | Fatty acyls   | [M-H] <sup>-</sup>  | 6.332  | 365.3428  |
| FA 26:0   | FA | Fatty acyls   | [M-H] <sup>-</sup>  | 8.57   | 395.38977 |
| FA 26:1   | FA | Fatty acyls   | [M-H] <sup>-</sup>  | 7.388  | 393.37387 |
| FA 28:0   | FA | Fatty acyls   | [M-H] <sup>-</sup>  | 10.15  | 423.4213  |

|                      |        |                      |             |        |           |
|----------------------|--------|----------------------|-------------|--------|-----------|
| FA 28:7              | FA     | Fatty acyls          | [M-H]-      | 5.865  | 409.31354 |
| FA 30:0              | FA     | Fatty acyls          | [M-H]-      | 11.98  | 451.45239 |
| HexCer 34:1;2O       | HexCer | Sphingolipids        | [M+CH3COO]- | 7.061  | 758.57947 |
| HexCer 40:1;2O       | HexCer | Sphingolipids        | [M+CH3COO]- | 11.224 | 842.67322 |
| HexCer 41:1;2O       | HexCer | Sphingolipids        | [M+CH3COO]- | 12.147 | 856.68927 |
| HexCer 42:1;2O       | HexCer | Sphingolipids        | [M+CH3COO]- | 13.096 | 870.70569 |
| HexCer 42:2;2O       | HexCer | Sphingolipids        | [M+CH3COO]- | 11.278 | 868.6889  |
| LPC 14:0             | LPC    | Glycerophospholipids | [M+H]+      | 1.801  | 468.3089  |
| LPC 14:0             | LPC    | Glycerophospholipids | [M+H]+      | 1.955  | 468.30844 |
| LPC 15:0             | LPC    | Glycerophospholipids | [M+H]+      | 2.353  | 482.32294 |
| LPC 16:0             | LPC    | Glycerophospholipids | [M+H]+      | 2.579  | 496.34076 |
| LPC 16:0             | LPC    | Glycerophospholipids | [M+H]+      | 2.738  | 496.34061 |
| LPC 16:1             | LPC    | Glycerophospholipids | [M+H]+      | 2.204  | 494.32266 |
| LPC 17:0             | LPC    | Glycerophospholipids | [M+H]+      | 3.113  | 510.35495 |
| LPC 17:1             | LPC    | Glycerophospholipids | [M+H]+      | 2.59   | 508.34061 |
| LPC 18:0             | LPC    | Glycerophospholipids | [M+H]+      | 3.325  | 524.36993 |
| LPC 18:0             | LPC    | Glycerophospholipids | [M+H]+      | 3.471  | 524.36969 |
| LPC 18:1             | LPC    | Glycerophospholipids | [M+H]+      | 2.816  | 522.35394 |
| LPC 18:1             | LPC    | Glycerophospholipids | [M+H]+      | 2.96   | 522.35406 |
| LPC 18:2             | LPC    | Glycerophospholipids | [M+H]+      | 2.316  | 520.33856 |
| LPC 18:2             | LPC    | Glycerophospholipids | [M+H]+      | 2.462  | 520.33856 |
| LPC 18:3             | LPC    | Glycerophospholipids | [M+H]+      | 2.114  | 518.32361 |
| LPC 19:0             | LPC    | Glycerophospholipids | [M+H]+      | 3.802  | 538.38593 |
| LPC 20:0             | LPC    | Glycerophospholipids | [M+H]+      | 4.12   | 552.40149 |
| LPC 20:1             | LPC    | Glycerophospholipids | [M+H]+      | 3.607  | 550.38739 |
| LPC 20:2             | LPC    | Glycerophospholipids | [M+H]+      | 3.142  | 548.37201 |
| LPC 20:3             | LPC    | Glycerophospholipids | [M+H]+      | 2.753  | 546.35583 |
| LPC 20:4             | LPC    | Glycerophospholipids | [M+H]+      | 2.357  | 544.33862 |
| LPC 20:4             | LPC    | Glycerophospholipids | [M+H]+      | 2.475  | 544.33856 |
| LPC 22:0             | LPC    | Glycerophospholipids | [M+H]+      | 4.705  | 580.43445 |
| LPC 22:1             | LPC    | Glycerophospholipids | [M+H]+      | 4.212  | 578.41687 |
| LPC 22:4             | LPC    | Glycerophospholipids | [M+H]+      | 3.043  | 572.37189 |
| LPC 22:5             | LPC    | Glycerophospholipids | [M+H]+      | 2.624  | 570.35437 |
| LPC 22:5             | LPC    | Glycerophospholipids | [M+H]+      | 2.842  | 570.35437 |
| LPC 22:6             | LPC    | Glycerophospholipids | [M+H]+      | 2.286  | 568.34088 |
| LPC 22:6             | LPC    | Glycerophospholipids | [M+H]+      | 2.408  | 568.34094 |
| LPC 24:0             | LPC    | Glycerophospholipids | [M+H]+      | 5.211  | 608.46533 |
| LPC 24:1             | LPC    | Glycerophospholipids | [M+H]+      | 4.733  | 606.44891 |
| LPE 16:0             | LPE    | Glycerophospholipids | [M-H]-      | 2.937  | 452.27856 |
| LPE 18:0             | LPE    | Glycerophospholipids | [M-H]-      | 4.184  | 480.30939 |
| LPE 18:1             | LPE    | Glycerophospholipids | [M-H]-      | 3.601  | 478.29391 |
| LPE 18:2             | LPE    | Glycerophospholipids | [M-H]-      | 2.678  | 476.2789  |
| PC 30:0 PC 14:0_16:0 | PC     | Glycerophospholipids | [M+CH3COO]- | 6.842  | 764.54523 |
| PC 31:0 PC 15:0_16:0 | PC     | Glycerophospholipids | [M+CH3COO]- | 7.33   | 778.5614  |
| PC 32:0              | PC     | Glycerophospholipids | [M+H]+      | 6.361  | 734.56897 |
| PC 32:0 PC 16:0_16:0 | PC     | Glycerophospholipids | [M+CH3COO]- | 7.863  | 792.57556 |

|                      |    |                      |             |        |           |
|----------------------|----|----------------------|-------------|--------|-----------|
| PC 32:1 PC 16:0_16:1 | PC | Glycerophospholipids | [M+CH3COO]- | 7.071  | 790.56122 |
| PC 32:2 PC 14:0_18:2 | PC | Glycerophospholipids | [M+CH3COO]- | 6.374  | 788.54724 |
| PC 33:0              | PC | Glycerophospholipids | [M+H]+      | 7.623  | 748.58331 |
| PC 33:1 PC 15:0_18:1 | PC | Glycerophospholipids | [M+CH3COO]- | 7.578  | 804.57672 |
| PC 33:2 PC 15:0_18:2 | PC | Glycerophospholipids | [M+CH3COO]- | 6.802  | 802.56323 |
| PC 34:0 PC 16:0_18:0 | PC | Glycerophospholipids | [M+CH3COO]- | 9.147  | 820.60693 |
| PC 34:1 PC 16:0_18:1 | PC | Glycerophospholipids | [M+CH3COO]- | 8.147  | 818.59143 |
| PC 34:2 PC 16:0_18:2 | PC | Glycerophospholipids | [M+CH3COO]- | 7.288  | 816.57648 |
| PC 34:3              | PC | Glycerophospholipids | [M+H]+      | 6.295  | 756.5542  |
| PC 34:3 PC 16:1_18:2 | PC | Glycerophospholipids | [M+CH3COO]- | 6.549  | 814.56073 |
| PC 34:4 PC 14:0_20:4 | PC | Glycerophospholipids | [M+CH3COO]- | 6.34   | 812.54675 |
| PC 35:0              | PC | Glycerophospholipids | [M+H]+      | 8.725  | 776.61792 |
| PC 35:1              | PC | Glycerophospholipids | [M+H]+      | 7.87   | 774.59985 |
| PC 35:2 PC 17:0_18:2 | PC | Glycerophospholipids | [M+CH3COO]- | 7.832  | 830.59357 |
| PC 35:3              | PC | Glycerophospholipids | [M+H]+      | 6.441  | 770.56824 |
| PC 35:4              | PC | Glycerophospholipids | [M+H]+      | 6.234  | 768.55249 |
| PC 36:0 PC 18:0_18:0 | PC | Glycerophospholipids | [M+CH3COO]- | 10.636 | 848.6402  |
| PC 36:1 PC 18:0_18:1 | PC | Glycerophospholipids | [M+CH3COO]- | 9.482  | 846.62549 |
| PC 36:2 PC 18:0_18:2 | PC | Glycerophospholipids | [M+CH3COO]- | 8.451  | 844.60828 |
| PC 36:2 PC 18:1_18:1 | PC | Glycerophospholipids | [M+H]+      | 7.589  | 786.59766 |
| PC 36:3 PC 16:0_20:3 | PC | Glycerophospholipids | [M+CH3COO]- | 7.596  | 842.59229 |
| PC 36:3 PC 16:0_20:3 | PC | Glycerophospholipids | [M+CH3COO]- | 8.03   | 842.59235 |
| PC 36:3 PC 16:0_20:3 | PC | Glycerophospholipids | [M+CH3COO]- | 7.793  | 842.59265 |
| PC 36:3 PC 18:1_18:2 | PC | Glycerophospholipids | [M+CH3COO]- | 7.497  | 842.59235 |
| PC 36:4              | PC | Glycerophospholipids | [M+H]+      | 6.618  | 782.56964 |
| PC 36:4              | PC | Glycerophospholipids | [M+H]+      | 6.22   | 782.56964 |
| PC 36:4 PC 16:0_20:4 | PC | Glycerophospholipids | [M+CH3COO]- | 7.241  | 840.57556 |
| PC 36:4 PC 18:2_18:2 | PC | Glycerophospholipids | [M+CH3COO]- | 6.744  | 840.57776 |
| PC 36:5 PC 16:1_20:4 | PC | Glycerophospholipids | [M+CH3COO]- | 6.506  | 838.56226 |
| PC 36:6 PC 14:0_22:6 | PC | Glycerophospholipids | [M+CH3COO]- | 6.127  | 836.54596 |
| PC 37:1              | PC | Glycerophospholipids | [M+H]+      | 9.057  | 802.63239 |
| PC 37:2 PC 19:0_18:2 | PC | Glycerophospholipids | [M+CH3COO]- | 9.125  | 858.62518 |
| PC 37:2 PC 19:0_18:2 | PC | Glycerophospholipids | [M+CH3COO]- | 8.969  | 858.62585 |
| PC 37:4              | PC | Glycerophospholipids | [M+CH3COO]- | 8.387  | 854.59253 |
| PC 37:4 PC 17:0_20:4 | PC | Glycerophospholipids | [M+CH3COO]- | 7.785  | 854.59308 |
| PC 37:5              | PC | Glycerophospholipids | [M+H]+      | 6.529  | 794.56714 |
| PC 37:6 PC 15:0_22:6 | PC | Glycerophospholipids | [M+CH3COO]- | 6.522  | 850.5603  |
| PC 38:1              | PC | Glycerophospholipids | [M+H]+      | 9.525  | 816.64935 |
| PC 38:2 PC 18:0_20:2 | PC | Glycerophospholipids | [M+CH3COO]- | 9.63   | 872.64038 |
| PC 38:2 PC 20:0_18:2 | PC | Glycerophospholipids | [M+CH3COO]- | 9.869  | 872.64026 |
| PC 38:3 PC 18:0_20:3 | PC | Glycerophospholipids | [M+CH3COO]- | 8.82   | 870.625   |
| PC 38:3 PC 18:0_20:3 | PC | Glycerophospholipids | [M+CH3COO]- | 9.07   | 870.62732 |
| PC 38:4 PC 16:0_22:4 | PC | Glycerophospholipids | [M+CH3COO]- | 7.99   | 868.60889 |
| PC 38:4 PC 18:0_20:4 | PC | Glycerophospholipids | [M+CH3COO]- | 8.389  | 868.60724 |
| PC 38:5 PC 16:0_22:5 | PC | Glycerophospholipids | [M+CH3COO]- | 7.231  | 866.59143 |
| PC 38:5 PC 16:0_22:5 | PC | Glycerophospholipids | [M+CH3COO]- | 7.663  | 866.59155 |

|                          |      |                      |             |        |           |
|--------------------------|------|----------------------|-------------|--------|-----------|
| PC 38:5 PC 18:1_20:4     | PC   | Glycerophospholipids | [M+CH3COO]- | 7.432  | 866.59174 |
| PC 38:6 PC 16:0_22:6     | PC   | Glycerophospholipids | [M+CH3COO]- | 6.965  | 864.57776 |
| PC 38:6 PC 18:2_20:4     | PC   | Glycerophospholipids | [M+CH3COO]- | 6.698  | 864.57715 |
| PC 38:7                  | PC   | Glycerophospholipids | [M+H]+      | 5.847  | 804.54456 |
| PC 39:5 PC 17:0_22:5     | PC   | Glycerophospholipids | [M+CH3COO]- | 8.238  | 880.60712 |
| PC 39:6 PC 17:0_22:6     | PC   | Glycerophospholipids | [M+CH3COO]- | 7.464  | 878.59351 |
| PC 39:7                  | PC   | Glycerophospholipids | [M+H]+      | 7.057  | 818.56659 |
| PC 40:2                  | PC   | Glycerophospholipids | [M+H]+      | 10.146 | 842.66113 |
| PC 40:3                  | PC   | Glycerophospholipids | [M+H]+      | 9.135  | 840.64905 |
| PC 40:4                  | PC   | Glycerophospholipids | [M+H]+      | 8.663  | 838.63239 |
| PC 40:4 PC 18:0_22:4     | PC   | Glycerophospholipids | [M+CH3COO]- | 9.282  | 896.64136 |
| PC 40:4 PC 20:0_20:4     | PC   | Glycerophospholipids | [M+CH3COO]- | 9.815  | 896.63989 |
| PC 40:5                  | PC   | Glycerophospholipids | [M+H]+      | 7.63   | 836.61499 |
| PC 40:5 PC 18:0_22:5     | PC   | Glycerophospholipids | [M+CH3COO]- | 8.901  | 894.62378 |
| PC 40:5 PC 18:0_22:5     | PC   | Glycerophospholipids | [M+CH3COO]- | 8.364  | 894.62335 |
| PC 40:6 PC 18:0_22:6     | PC   | Glycerophospholipids | [M+CH3COO]- | 8.036  | 892.60651 |
| PC 40:6 PC 20:2_20:4     | PC   | Glycerophospholipids | [M+CH3COO]- | 7.603  | 892.60919 |
| PC 40:7 PC 18:1_22:6     | PC   | Glycerophospholipids | [M+CH3COO]- | 7.136  | 890.59186 |
| PC 40:8 PC 18:2_22:6     | PC   | Glycerophospholipids | [M+CH3COO]- | 6.463  | 888.57587 |
| PC 40:8 PC 20:4_20:4     | PC   | Glycerophospholipids | [M+CH3COO]- | 6.602  | 888.57648 |
| PC 40:9                  | PC   | Glycerophospholipids | [M+H]+      | 5.663  | 828.55707 |
| PC 41:5                  | PC   | Glycerophospholipids | [M+H]+      | 8.45   | 850.6286  |
| PC 42:10 PC 20:4_22:6    | PC   | Glycerophospholipids | [M+CH3COO]- | 6.384  | 912.57672 |
| PC 42:5                  | PC   | Glycerophospholipids | [M+H]+      | 8.745  | 864.64746 |
| PC 42:6 PC 18:0_24:6     | PC   | Glycerophospholipids | [M+CH3COO]- | 8.822  | 920.63959 |
| PC 42:8                  | PC   | Glycerophospholipids | [M+H]+      | 6.635  | 858.59662 |
| PC 42:9 PC 20:4_22:5     | PC   | Glycerophospholipids | [M+CH3COO]- | 6.99   | 914.59381 |
| PC O-32:0 PC O-16:0_16:0 | PC-O | Glycerophospholipids | [M+CH3COO]- | 8.57   | 778.59814 |
| PC O-32:1                | PC-O | Glycerophospholipids | [M+H]+      | 7.666  | 718.57568 |
| PC O-32:1                | PC-O | Glycerophospholipids | [M+H]+      | 6.979  | 718.57562 |
| PC O-34:0                | PC-O | Glycerophospholipids | [M+H]+      | 8.904  | 748.62408 |
| PC O-34:1 PC O-18:1_16:0 | PC-O | Glycerophospholipids | [M+CH3COO]- | 8.8    | 804.61407 |
| PC O-34:2                | PC-O | Glycerophospholipids | [M+H]+      | 7.17   | 744.58868 |
| PC O-34:3 PC O-16:1_18:2 | PC-O | Glycerophospholipids | [M+CH3COO]- | 7.838  | 800.58124 |
| PC O-36:3                | PC-O | Glycerophospholipids | [M+H]+      | 7.317  | 770.60413 |
| PC O-36:3                | PC-O | Glycerophospholipids | [M+H]+      | 7.448  | 770.60333 |
| PC O-36:4 PC O-16:0_20:4 | PC-O | Glycerophospholipids | [M+CH3COO]- | 7.85   | 826.59863 |
| PC O-36:5 PC O-16:1_20:4 | PC-O | Glycerophospholipids | [M+CH3COO]- | 7.751  | 824.58234 |
| PC O-38:4 PC O-16:0_22:4 | PC-O | Glycerophospholipids | [M+CH3COO]- | 8.687  | 854.63074 |
| PC O-38:4 PC O-18:0_20:4 | PC-O | Glycerophospholipids | [M+CH3COO]- | 9.153  | 854.62836 |
| PC O-38:5 PC O-16:1_22:4 | PC-O | Glycerophospholipids | [M+CH3COO]- | 8.343  | 852.61426 |
| PC O-38:5 PC O-18:1_20:4 | PC-O | Glycerophospholipids | [M+CH3COO]- | 8.051  | 852.61243 |
| PC O-38:6 PC O-16:0_22:6 | PC-O | Glycerophospholipids | [M+CH3COO]- | 7.511  | 850.59717 |
| PC O-38:6 PC O-18:2_20:4 | PC-O | Glycerophospholipids | [M+CH3COO]- | 7.948  | 850.5976  |
| PC O-38:7 PC O-16:1_22:6 | PC-O | Glycerophospholipids | [M+CH3COO]- | 7.426  | 848.5827  |
| PC O-39:10               | PC-O | Glycerophospholipids | [M+H]+      | 7.358  | 798.53906 |

|                          |       |                      |             |        |           |
|--------------------------|-------|----------------------|-------------|--------|-----------|
| PC O-40:4 PC O-20:0_20:4 | PC-O  | Glycerophospholipids | [M+CH3COO]- | 10.725 | 882.66107 |
| PC O-40:7 PC O-18:1_22:6 | PC-O  | Glycerophospholipids | [M+CH3COO]- | 7.692  | 876.61249 |
| PC O-40:8                | PC-O  | Glycerophospholipids | [M+H]+      | 7.266  | 816.59113 |
| PC O-41:10               | PC-O  | Glycerophospholipids | [M+H]+      | 8.438  | 826.57202 |
| PC O-41:11               | PC-O  | Glycerophospholipids | [M+H]+      | 7.58   | 824.55493 |
| PE 34:2 PE 16:0_18:2     | PE    | Glycerophospholipids | [M-H]-      | 7.468  | 714.5105  |
| PE 36:2 PE 18:0_18:2     | PE    | Glycerophospholipids | [M-H]-      | 8.669  | 742.53906 |
| PE 36:4 PE 16:0_20:4     | PE    | Glycerophospholipids | [M-H]-      | 7.412  | 738.51044 |
| PE 38:4 PE 18:0_20:4     | PE    | Glycerophospholipids | [M-H]-      | 8.601  | 766.53998 |
| PE 38:5 PE 18:1_20:4     | PE    | Glycerophospholipids | [M-H]-      | 7.658  | 764.52545 |
| PE 38:6 PE 16:0_22:6     | PE    | Glycerophospholipids | [M-H]-      | 7.12   | 762.51025 |
| PE 40:6 PE 18:0_22:6     | PE    | Glycerophospholipids | [M-H]-      | 6.968  | 790.53973 |
| PE O-36:5 PE O-16:1_20:4 | PE-O  | Glycerophospholipids | [M-H]-      | 7.988  | 722.51453 |
| PE O-38:5 PE O-18:1_20:4 | PE-O  | Glycerophospholipids | [M-H]-      | 9.304  | 750.5459  |
| PE O-38:6 PE O-18:2_20:4 | PE-O  | Glycerophospholipids | [M-H]-      | 8.192  | 748.5293  |
| PE P-36:4 PE P-16:0_20:4 | PE-P  | Glycerophospholipids | [M+H]+      | 7.245  | 724.52771 |
| PE P-38:5 PE P-18:1_20:4 | PE-P  | Glycerophospholipids | [M+H]+      | 7.403  | 750.54468 |
| PI 36:4                  | PI    | Glycerophospholipids | [M-H]-      | 6.046  | 857.52344 |
| PI 38:4 PI 18:0_20:4     | PI    | Glycerophospholipids | [M-H]-      | 6.862  | 885.55011 |
| SE 28:1/20:4             | Other | Other                | [M+NH4]+    | 15.236 | 704.63147 |
| SE 29:1/20:4             | Other | Other                | [M+NH4]+    | 15.402 | 718.64874 |
| SE 29:2/20:4             | Other | Other                | [M+NH4]+    | 15.158 | 716.63367 |
| SM 32:1;2O               | SM    | Sphingolipids        | [M+H]+      | 5.516  | 675.54181 |
| SM 33:1;2O               | SM    | Sphingolipids        | [M+H]+      | 5.834  | 689.55804 |
| SM 34:0;2O               | SM    | Sphingolipids        | [M+H]+      | 6.41   | 705.591   |
| SM 34:1;2O               | SM    | Sphingolipids        | [M+H]+      | 6.172  | 703.57684 |
| SM 34:1;3O               | SM    | Sphingolipids        | [M+H]+      | 5.939  | 719.5686  |
| SM 34:2;2O               | SM    | Sphingolipids        | [M+H]+      | 5.639  | 701.55902 |
| SM 34:2;3O               | SM    | Sphingolipids        | [M+H]+      | 5.454  | 717.55292 |
| SM 35:1;2O               | SM    | Sphingolipids        | [M+H]+      | 6.568  | 717.59039 |
| SM 36:1;2O               | SM    | Sphingolipids        | [M+H]+      | 6.996  | 731.60822 |
| SM 36:2;2O               | SM    | Sphingolipids        | [M+H]+      | 6.343  | 729.58997 |
| SM 38:1;2O               | SM    | Sphingolipids        | [M+H]+      | 8.051  | 759.63727 |
| SM 39:1;2O               | SM    | Sphingolipids        | [M+H]+      | 8.682  | 773.65027 |
| SM 40:1;2O               | SM    | Sphingolipids        | [M+H]+      | 9.336  | 787.66608 |
| SM 40:2;2O               | SM    | Sphingolipids        | [M+H]+      | 8.332  | 785.65222 |
| SM 40:2;2O               | SM    | Sphingolipids        | [M+H]+      | 8.141  | 785.6521  |
| SM 41:1;2O               | SM    | Sphingolipids        | [M+H]+      | 10.072 | 801.68402 |
| SM 41:2;2O               | SM    | Sphingolipids        | [M+H]+      | 8.989  | 799.66962 |
| SM 41:2;2O               | SM    | Sphingolipids        | [M+H]+      | 8.739  | 799.66931 |
| SM 42:1;2O               | SM    | Sphingolipids        | [M+H]+      | 10.831 | 815.7002  |
| SM 42:2;2O               | SM    | Sphingolipids        | [M+H]+      | 9.346  | 813.68555 |
| SM 42:2;2O               | SM    | Sphingolipids        | [M+H]+      | 9.686  | 813.68085 |
| SM 42:3;2O               | SM    | Sphingolipids        | [M+H]+      | 8.339  | 811.66962 |
| SM 43:1;2O               | SM    | Sphingolipids        | [M+H]+      | 11.494 | 829.71619 |
| SM 43:1;2O               | SM    | Sphingolipids        | [M+H]+      | 11.672 | 829.71478 |

|                           |    |               |                                     |        |           |
|---------------------------|----|---------------|-------------------------------------|--------|-----------|
| SM 43:2;2O                | SM | Sphingolipids | [M+H] <sup>+</sup>                  | 10.244 | 827.70178 |
| ST 24:1;O4                | ST | Sterol lipids | [M-H] <sup>-</sup>                  | 1.197  | 391.28586 |
| ST 24:1;O4                | ST | Sterol lipids | [M-H] <sup>-</sup>                  | 1.825  | 391.28589 |
| ST 24:1;O4                | ST | Sterol lipids | [M-H] <sup>-</sup>                  | 1.972  | 391.28595 |
| ST 27:1;O                 | ST | Sterol lipids | [M+H-H <sub>2</sub> O] <sup>+</sup> | 5.498  | 369.3512  |
| ST 27:1;O                 | ST | Sterol lipids | [M+H-H <sub>2</sub> O] <sup>+</sup> | 3.886  | 369.35114 |
| ST 27:1;O;S               | ST | Sterol lipids | [M-H] <sup>-</sup>                  | 3.996  | 465.30414 |
| ST 28:1;O;S               | ST | Sterol lipids | [M-H] <sup>-</sup>                  | 4.178  | 479.3201  |
| TG 42:1 TG 12:0_12:0_18:1 | TG | Glycerolipids | [M+NH <sub>4</sub> ] <sup>+</sup>   | 14.468 | 738.65985 |
| TG 44:0 TG 14:0_14:0_16:0 | TG | Glycerolipids | [M+NH <sub>4</sub> ] <sup>+</sup>   | 15.176 | 768.70807 |
| TG 44:1 TG 12:0_16:0_16:1 | TG | Glycerolipids | [M+NH <sub>4</sub> ] <sup>+</sup>   | 15.061 | 766.69147 |
| TG 44:1 TG 14:0_16:0_14:1 | TG | Glycerolipids | [M+NH <sub>4</sub> ] <sup>+</sup>   | 14.911 | 766.69116 |
| TG 45:0 TG 14:0_15:0_16:0 | TG | Glycerolipids | [M+NH <sub>4</sub> ] <sup>+</sup>   | 15.325 | 782.71918 |
| TG 45:1 TG 14:0_15:0_16:1 | TG | Glycerolipids | [M+NH <sub>4</sub> ] <sup>+</sup>   | 15.083 | 780.70911 |
| TG 46:0 TG 14:0_16:0_16:0 | TG | Glycerolipids | [M+NH <sub>4</sub> ] <sup>+</sup>   | 15.467 | 796.73883 |
| TG 46:1 TG 14:0_16:0_16:1 | TG | Glycerolipids | [M+NH <sub>4</sub> ] <sup>+</sup>   | 15.248 | 794.72321 |
| TG 46:2 TG 12:0_16:0_18:2 | TG | Glycerolipids | [M+NH <sub>4</sub> ] <sup>+</sup>   | 15.032 | 792.70605 |
| TG 46:3 TG 12:0_16:1_18:2 | TG | Glycerolipids | [M+NH <sub>4</sub> ] <sup>+</sup>   | 14.595 | 790.69354 |
| TG 47:0 TG 15:0_16:0_16:0 | TG | Glycerolipids | [M+NH <sub>4</sub> ] <sup>+</sup>   | 15.583 | 810.75439 |
| TG 47:1 TG 15:0_16:0_16:1 | TG | Glycerolipids | [M+NH <sub>4</sub> ] <sup>+</sup>   | 15.39  | 808.73889 |
| TG 48:0 TG 16:0_16:0_16:0 | TG | Glycerolipids | [M+NH <sub>4</sub> ] <sup>+</sup>   | 15.709 | 824.77197 |
| TG 48:1 TG 14:0_16:0_18:1 | TG | Glycerolipids | [M+NH <sub>4</sub> ] <sup>+</sup>   | 15.502 | 822.75281 |
| TG 48:2 TG 14:0_16:0_18:2 | TG | Glycerolipids | [M+NH <sub>4</sub> ] <sup>+</sup>   | 15.265 | 820.73914 |
| TG 48:4 TG 12:0_18:2_18:2 | TG | Glycerolipids | [M+NH <sub>4</sub> ] <sup>+</sup>   | 14.681 | 816.70428 |
| TG 49:0 TG 15:0_16:0_18:0 | TG | Glycerolipids | [M+NH <sub>4</sub> ] <sup>+</sup>   | 15.815 | 838.7876  |
| TG 49:1 TG 15:0_16:0_18:1 | TG | Glycerolipids | [M+NH <sub>4</sub> ] <sup>+</sup>   | 15.62  | 836.76892 |
| TG 49:2 TG 16:0_16:1_17:1 | TG | Glycerolipids | [M+NH <sub>4</sub> ] <sup>+</sup>   | 15.406 | 834.75317 |
| TG 49:3 TG 15:0_16:1_18:2 | TG | Glycerolipids | [M+NH <sub>4</sub> ] <sup>+</sup>   | 15.145 | 832.73785 |
| TG 50:0 TG 16:0_16:0_18:0 | TG | Glycerolipids | [M+NH <sub>4</sub> ] <sup>+</sup>   | 15.923 | 852.80359 |
| TG 50:1 TG 16:0_16:0_18:1 | TG | Glycerolipids | [M+NH <sub>4</sub> ] <sup>+</sup>   | 15.731 | 850.78589 |
| TG 50:2 TG 16:0_16:1_18:1 | TG | Glycerolipids | [M+NH <sub>4</sub> ] <sup>+</sup>   | 15.528 | 848.76862 |
| TG 50:3 TG 16:0_16:1_18:2 | TG | Glycerolipids | [M+NH <sub>4</sub> ] <sup>+</sup>   | 15.295 | 846.75311 |
| TG 50:4 TG 16:1_16:1_18:2 | TG | Glycerolipids | [M+NH <sub>4</sub> ] <sup>+</sup>   | 15.054 | 844.74091 |
| TG 50:5 TG 16:0_16:1_18:4 | TG | Glycerolipids | [M+NH <sub>4</sub> ] <sup>+</sup>   | 14.888 | 842.72449 |
| TG 51:0 TG 16:0_17:0_18:0 | TG | Glycerolipids | [M+NH <sub>4</sub> ] <sup>+</sup>   | 16.021 | 866.81622 |
| TG 51:1 TG 16:0_17:0_18:1 | TG | Glycerolipids | [M+NH <sub>4</sub> ] <sup>+</sup>   | 15.835 | 864.79895 |
| TG 51:2 TG 16:0_17:1_18:1 | TG | Glycerolipids | [M+NH <sub>4</sub> ] <sup>+</sup>   | 15.643 | 862.78784 |
| TG 51:3 TG 15:0_18:1_18:2 | TG | Glycerolipids | [M+NH <sub>4</sub> ] <sup>+</sup>   | 15.431 | 860.77222 |
| TG 51:4 TG 15:0_18:2_18:2 | TG | Glycerolipids | [M+NH <sub>4</sub> ] <sup>+</sup>   | 15.272 | 858.75171 |
| TG 52:0 TG 16:0_18:0_18:0 | TG | Glycerolipids | [M+NH <sub>4</sub> ] <sup>+</sup>   | 16.12  | 880.8299  |
| TG 52:1 TG 16:0_18:0_18:1 | TG | Glycerolipids | [M+NH <sub>4</sub> ] <sup>+</sup>   | 15.938 | 878.815   |
| TG 52:2 TG 16:0_18:1_18:1 | TG | Glycerolipids | [M+NH <sub>4</sub> ] <sup>+</sup>   | 15.751 | 876.80127 |
| TG 52:3 TG 16:0_18:1_18:2 | TG | Glycerolipids | [M+NH <sub>4</sub> ] <sup>+</sup>   | 15.547 | 874.7865  |
| TG 52:4 TG 16:0_18:2_18:2 | TG | Glycerolipids | [M+NH <sub>4</sub> ] <sup>+</sup>   | 15.322 | 872.7713  |
| TG 52:5 TG 16:0_18:2_18:3 | TG | Glycerolipids | [M+NH <sub>4</sub> ] <sup>+</sup>   | 15.063 | 870.75128 |
| TG 52:6 TG 16:1_18:2_18:3 | TG | Glycerolipids | [M+NH <sub>4</sub> ] <sup>+</sup>   | 14.934 | 868.73798 |

|                            |    |               |                      |        |           |
|----------------------------|----|---------------|----------------------|--------|-----------|
| TG 53:1 TG 17:0_18:0_18:1  | TG | Glycerolipids | [M+NH4] <sup>+</sup> | 16.035 | 892.83533 |
| TG 53:2 TG 17:0_18:1_18:1  | TG | Glycerolipids | [M+NH4] <sup>+</sup> | 15.851 | 890.81409 |
| TG 53:3 TG 17:0_18:1_18:2  | TG | Glycerolipids | [M+NH4] <sup>+</sup> | 15.661 | 888.79974 |
| TG 53:4 TG 17:1_18:1_18:2  | TG | Glycerolipids | [M+NH4] <sup>+</sup> | 15.547 | 886.78619 |
| TG 53:5 TG 16:0_18:2_19:3  | TG | Glycerolipids | [M+NH4] <sup>+</sup> | 15.338 | 884.76849 |
| TG 53:6 TG 15:0_18:2_20:4  | TG | Glycerolipids | [M+NH4] <sup>+</sup> | 15.09  | 882.75458 |
| TG 54:0 TG 16:0_18:0_20:0  | TG | Glycerolipids | [M+NH4] <sup>+</sup> | 16.32  | 908.86292 |
| TG 54:2 TG 18:0_18:1_18:1  | TG | Glycerolipids | [M+NH4] <sup>+</sup> | 15.951 | 904.83105 |
| TG 54:3 TG 18:0_18:1_18:2  | TG | Glycerolipids | [M+NH4] <sup>+</sup> | 15.768 | 902.81812 |
| TG 54:4 TG 16:0_18:1_20:3  | TG | Glycerolipids | [M+NH4] <sup>+</sup> | 15.569 | 900.80103 |
| TG 54:4 TG 18:1_18:1_18:2  | TG | Glycerolipids | [M+NH4] <sup>+</sup> | 15.659 | 900.80206 |
| TG 54:5 TG 16:0_18:1_20:4  | TG | Glycerolipids | [M+NH4] <sup>+</sup> | 15.359 | 898.78558 |
| TG 54:6 TG 16:0_18:2_20:4  | TG | Glycerolipids | [M+NH4] <sup>+</sup> | 15.233 | 896.77039 |
| TG 54:7 TG 16:0_18:2_20:5  | TG | Glycerolipids | [M+NH4] <sup>+</sup> | 15.053 | 894.75494 |
| TG 54:7 TG 18:2_18:2_18:3  | TG | Glycerolipids | [M+NH4] <sup>+</sup> | 14.987 | 894.75415 |
| TG 55:0 TG 15:0_16:0_24:0  | TG | Glycerolipids | [M+NH4] <sup>+</sup> | 16.433 | 922.88165 |
| TG 55:2 TG 17:0_18:1_20:1  | TG | Glycerolipids | [M+NH4] <sup>+</sup> | 16.045 | 918.84735 |
| TG 55:3 TG 19:0_18:1_18:2  | TG | Glycerolipids | [M+NH4] <sup>+</sup> | 15.868 | 916.83527 |
| TG 55:4 TG 17:0_18:1_20:3  | TG | Glycerolipids | [M+NH4] <sup>+</sup> | 15.691 | 914.8222  |
| TG 55:5 TG 17:0_18:1_20:4  | TG | Glycerolipids | [M+NH4] <sup>+</sup> | 15.581 | 912.79901 |
| TG 55:6 TG 16:0_17:0_22:6  | TG | Glycerolipids | [M+NH4] <sup>+</sup> | 15.365 | 910.78284 |
| TG 56:0 TG 16:0_16:0_24:0  | TG | Glycerolipids | [M+NH4] <sup>+</sup> | 16.529 | 936.8949  |
| TG 56:1 TG 16:0_18:0_22:1  | TG | Glycerolipids | [M+NH4] <sup>+</sup> | 16.327 | 934.87781 |
| TG 56:2 TG 16:0_22:0_18:2  | TG | Glycerolipids | [M+NH4] <sup>+</sup> | 16.127 | 932.86102 |
| TG 56:3 TG 16:0_22:1_18:2  | TG | Glycerolipids | [M+NH4] <sup>+</sup> | 15.938 | 930.85071 |
| TG 56:4 TG 16:0_18:1_22:3  | TG | Glycerolipids | [M+NH4] <sup>+</sup> | 15.78  | 928.83405 |
| TG 56:5 TG 16:0_18:1_22:4  | TG | Glycerolipids | [M+NH4] <sup>+</sup> | 15.684 | 926.81653 |
| TG 56:6 TG 16:0_18:2_22:4  | TG | Glycerolipids | [M+NH4] <sup>+</sup> | 15.533 | 924.79901 |
| TG 56:7 TG 18:1_18:2_20:4  | TG | Glycerolipids | [M+NH4] <sup>+</sup> | 15.284 | 922.78149 |
| TG 56:8 TG 18:2_18:2_20:4  | TG | Glycerolipids | [M+NH4] <sup>+</sup> | 15.098 | 920.77075 |
| TG 56:9 TG 18:2_18:2_20:5  | TG | Glycerolipids | [M+NH4] <sup>+</sup> | 14.821 | 918.75299 |
| TG 56:9 TG 18:2_18:3_20:4  | TG | Glycerolipids | [M+NH4] <sup>+</sup> | 14.899 | 918.7536  |
| TG 57:0 TG 16:0_17:0_24:0  | TG | Glycerolipids | [M+NH4] <sup>+</sup> | 16.635 | 950.90869 |
| TG 57:1 TG 16:0_23:0_18:1  | TG | Glycerolipids | [M+NH4] <sup>+</sup> | 16.446 | 948.89398 |
| TG 57:3 TG 18:1_18:1_21:1  | TG | Glycerolipids | [M+NH4] <sup>+</sup> | 16.064 | 944.86707 |
| TG 57:5 TG 17:0_18:1_22:4  | TG | Glycerolipids | [M+NH4] <sup>+</sup> | 15.781 | 940.83081 |
| TG 57:7 TG 17:0_18:1_22:6  | TG | Glycerolipids | [M+NH4] <sup>+</sup> | 15.469 | 936.80084 |
| TG 58:0 TG 16:0_18:0_24:0  | TG | Glycerolipids | [M+NH4] <sup>+</sup> | 16.742 | 964.92609 |
| TG 58:1 TG 16:0_24:0_18:1  | TG | Glycerolipids | [M+NH4] <sup>+</sup> | 16.526 | 962.91064 |
| TG 58:10 TG 18:2_18:2_22:6 | TG | Glycerolipids | [M+NH4] <sup>+</sup> | 14.94  | 944.76941 |
| TG 58:2 TG 16:0_18:1_24:1  | TG | Glycerolipids | [M+NH4] <sup>+</sup> | 16.335 | 960.89417 |
| TG 58:3 TG 22:0_18:1_18:2  | TG | Glycerolipids | [M+NH4] <sup>+</sup> | 16.149 | 958.87799 |
| TG 58:4 TG 18:1_22:1_18:2  | TG | Glycerolipids | [M+NH4] <sup>+</sup> | 15.951 | 956.85974 |
| TG 58:6 TG 18:0_18:1_22:5  | TG | Glycerolipids | [M+NH4] <sup>+</sup> | 15.75  | 952.8316  |
| TG 58:7 TG 18:1_18:1_22:5  | TG | Glycerolipids | [M+NH4] <sup>+</sup> | 15.564 | 950.81598 |
| TG 58:8 TG 18:1_18:2_22:5  | TG | Glycerolipids | [M+NH4] <sup>+</sup> | 15.399 | 948.79791 |

|                            |    |               |                      |        |            |
|----------------------------|----|---------------|----------------------|--------|------------|
| TG 58:9 TG 18:2_20:3_20:4  | TG | Glycerolipids | [M+NH4] <sup>+</sup> | 15.203 | 946.78644  |
| TG 60:10 TG 18:1_20:4_22:5 | TG | Glycerolipids | [M+NH4] <sup>+</sup> | 15.291 | 972.80188  |
| TG 60:11 TG 18:2_20:4_22:5 | TG | Glycerolipids | [M+NH4] <sup>+</sup> | 15.056 | 970.7832   |
| TG 60:12 TG 18:2_20:4_22:6 | TG | Glycerolipids | [M+NH4] <sup>+</sup> | 14.846 | 968.76764  |
| TG 60:2 TG 16:0_20:1_24:1  | TG | Glycerolipids | [M+NH4] <sup>+</sup> | 16.527 | 988.92578  |
| TG 60:3 TG 16:0_26:1_18:2  | TG | Glycerolipids | [M+NH4] <sup>+</sup> | 16.335 | 986.90851  |
| TG 60:5 TG 24:1_18:2_18:2  | TG | Glycerolipids | [M+NH4] <sup>+</sup> | 16.042 | 982.87842  |
| TG 60:9 TG 18:0_20:4_22:5  | TG | Glycerolipids | [M+NH4] <sup>+</sup> | 15.456 | 974.81641  |
| TG 60:9 TG 18:1_20:4_22:4  | TG | Glycerolipids | [M+NH4] <sup>+</sup> | 15.219 | 974.81567  |
| TG 62:13 TG 20:4_20:4_22:5 | TG | Glycerolipids | [M+NH4] <sup>+</sup> | 14.954 | 994.78546  |
| TG 62:14 TG 20:4_20:4_22:6 | TG | Glycerolipids | [M+NH4] <sup>+</sup> | 14.701 | 992.77051  |
| TG 62:2 TG 18:0_18:1_26:1  | TG | Glycerolipids | [M+NH4] <sup>+</sup> | 16.727 | 1016.95728 |
| TG 62:4 TG 18:1_26:1_18:2  | TG | Glycerolipids | [M+NH4] <sup>+</sup> | 16.344 | 1012.9231  |



**Table S3.** List of *p*-values and log2 fold changes at the three time points for 377 lipids.

| Lipid                        | <i>p</i> -Value |        |        | log2 FoldChange |        |        | NI Associated |
|------------------------------|-----------------|--------|--------|-----------------|--------|--------|---------------|
|                              | Week 5          | Week 2 | Week 0 | Week 5          | Week 2 | Week 0 |               |
| CAR 16:0                     | 0.507           | 0.317  | 0.252  | 0.228           | -0.329 | -0.366 | No            |
| CAR 16:1                     | 0.522           | 0.661  | 0.455  | 0.719           | -0.281 | -0.550 | No            |
| CAR 18:0                     | 0.266           | 0.223  | 0.524  | 0.450           | -0.334 | -0.183 | No            |
| CAR 18:1                     | 0.827           | 0.193  | 0.455  | 0.085           | -0.442 | -0.262 | No            |
| CE 18:1                      | 0.292           | 0.515  | 0.135  | 0.394           | 0.196  | 0.408  | No            |
| CE 18:2                      | 0.572           | 0.674  | 0.578  | 0.192           | 0.100  | 0.133  | No            |
| CE 18:3                      | 0.355           | 0.117  | 0.875  | 0.563           | 0.584  | 0.085  | No            |
| CE 20:4                      | 0.016           | 0.862  | 0.016  | -0.441          | 0.027  | -0.268 | Yes           |
| CE 22:5                      | 0.044           | 0.452  | 0.249  | -0.900          | 0.254  | -0.252 | Yes           |
| CE 22:6                      | 0.609           | 0.404  | 0.714  | -0.201          | -0.252 | 0.084  | No            |
| Cer 34:1;2O Cer 18:1;2O/16:0 | 0.278           | 0.492  | 0.521  | 0.546           | 0.328  | 0.206  | No            |
| Cer 40:1;2O Cer 18:1;2O/22:0 | 0.079           | 0.282  | 0.190  | 0.776           | 0.405  | 0.548  | No            |
| Cer 41:1;2O Cer 18:1;2O/23:0 | 0.007           | 0.467  | 0.185  | 0.644           | 0.134  | 0.339  | Yes           |
| Cer 42:1;2O Cer 18:1;2O/24:0 | 0.057           | 0.170  | 0.274  | 0.581           | 0.337  | 0.307  | No            |
| Cer 42:2;2O Cer 18:1;2O/24:1 | 0.096           | 0.322  | 0.408  | 0.878           | 0.365  | 0.282  | No            |
| Cer 42:3;2O Cer 18:1;2O/24:2 | 0.293           | 0.507  | 0.850  | 0.846           | 0.513  | 0.094  | No            |
| Cer 43:1;2O Cer 18:1;2O/25:0 | 0.185           | 0.345  | 0.930  | 0.950           | 0.693  | 0.035  | No            |
| Cer 44:1;2O Cer 18:1;2O/26:0 | 0.254           | 0.671  | 0.087  | 0.587           | -0.161 | 0.930  | No            |
| CoQ9                         | 0.084           | 0.031  | 0.994  | 0.591           | 0.620  | 0.003  | No            |
| DG 32:1                      | 0.007           | 0.710  | 0.109  | 1.101           | 0.116  | -0.474 | Yes           |
| DG 32:3                      | 0.011           | 0.408  | 0.786  | -0.130          | -0.047 | -0.013 | No            |
| DG 34:0                      | 0.492           | 0.795  | 0.090  | 0.068           | -0.028 | -0.208 | No            |
| DG 34:0                      | 0.033           | 0.830  | 0.795  | 0.605           | 0.051  | -0.035 | Yes           |
| DG 34:1 DG 16:0_18:1         | 0.008           | 0.949  | 0.542  | 1.032           | 0.021  | -0.224 | Yes           |
| DG 34:2 DG 16:0_18:2         | 0.031           | 0.879  | 0.685  | 0.805           | 0.046  | -0.163 | Yes           |
| DG 34:3 DG 16:1_18:2         | 0.048           | 0.854  | 0.191  | 0.849           | 0.085  | -1.258 | Yes           |
| DG 36:2 DG 18:1_18:1         | 0.049           | 0.797  | 0.504  | 0.700           | -0.103 | 0.454  | Yes           |
| DG 36:3 DG 18:1_18:2         | 0.307           | 0.606  | 0.752  | 0.381           | -0.159 | -0.122 | No            |
| DG 36:4                      | 0.287           | 0.716  | 0.149  | 0.457           | -0.119 | -0.489 | No            |
| DG 36:4 DG 18:2_18:2         | 0.525           | 0.508  | 0.438  | 0.257           | -0.206 | -0.341 | No            |
| DG 36:5 DG 18:2_18:3         | 0.558           | 0.754  | 0.132  | -0.497          | -0.180 | -1.039 | No            |
| DG 37:6                      | 0.131           | 0.110  | 0.598  | -2.019          | -1.672 | 0.548  | No            |
| DG 37:7                      | 0.397           | 0.982  | 0.965  | -0.360          | -0.004 | -0.005 | No            |
| DG 37:7                      | 0.230           | 0.127  | 0.537  | -2.507          | -2.007 | -1.100 | No            |
| DG 38:2                      | 0.688           | 0.440  | 0.396  | -0.107          | 0.136  | 0.118  | No            |
| DG 38:4                      | 0.197           | 0.177  | 0.795  | 0.533           | 0.403  | -0.066 | No            |
| DG 38:5 DG 18:1_20:4         | 0.526           | 0.486  | 0.194  | -0.393          | -0.119 | -0.291 | No            |
| DG 38:6                      | 0.277           | 0.323  | 0.191  | -0.640          | -0.189 | -0.422 | No            |
| DG 40:2                      | 0.335           | 0.924  | 0.734  | 0.194           | 0.006  | 0.039  | No            |
| DG 40:4                      | 0.011           | 0.887  | 0.045  | -0.347          | 0.016  | -0.147 | Yes           |
| DG 40:5                      | 0.547           | 0.484  | 0.960  | 0.333           | 0.116  | -0.014 | No            |
| DG 40:5                      | 0.630           | 0.470  | 0.901  | -0.363          | 0.233  | 0.092  | No            |
| DG 40:6                      | 0.790           | 0.908  | 0.551  | -0.277          | -0.022 | -0.231 | No            |

|           |       |       |       |        |        |        |     |
|-----------|-------|-------|-------|--------|--------|--------|-----|
| DG 40:8   | 0.046 | 0.715 | 0.050 | -0.188 | 0.032  | -0.148 | No  |
| DG 42:4   | 0.026 | 0.997 | 0.849 | -1.719 | -0.002 | -0.070 | Yes |
| DG 42:5   | 0.441 | 0.816 | 0.622 | 0.246  | 0.100  | -0.146 | No  |
| DG 42:6   | 0.539 | 0.790 | 0.838 | -0.183 | -0.056 | 0.032  | No  |
| DG 43:6   | 0.916 | 0.406 | 0.138 | 0.017  | 0.098  | 0.162  | No  |
| DG 44:9   | 0.797 | 0.686 | 0.523 | -0.181 | 0.118  | 0.182  | No  |
| DG 49:6   | 0.962 | 0.046 | 0.582 | 0.019  | 0.261  | -0.114 | No  |
| DG 49:8   | 0.016 | 0.814 | 0.965 | 1.639  | 0.117  | -0.022 | Yes |
| DG 51:10  | 0.155 | 0.489 | 0.685 | 1.154  | 0.370  | -0.326 | No  |
| DG 51:6   | 0.135 | 0.629 | 0.237 | 0.289  | -0.059 | -0.168 | No  |
| DG 51:7   | 0.010 | 0.690 | 0.153 | 1.247  | 0.105  | -0.375 | Yes |
| DG 51:8   | 0.014 | 0.713 | 0.466 | 1.737  | 0.176  | -0.664 | Yes |
| DG 51:9   | 0.015 | 0.766 | 0.457 | 1.509  | 0.116  | -0.375 | Yes |
| DG 52:7   | 0.140 | 0.444 | 0.968 | 0.429  | 0.096  | -0.006 | No  |
| FA 14:0   | 0.770 | 0.780 | 0.451 | -0.045 | 0.055  | -0.270 | No  |
| FA 14:1   | 0.726 | 0.570 | 0.256 | -0.176 | 0.205  | -0.738 | No  |
| FA 15:0   | 0.382 | 0.616 | 0.563 | 0.074  | -0.062 | 0.087  | No  |
| FA 16:0   | 0.988 | 0.474 | 0.381 | 0.003  | -0.103 | -0.191 | No  |
| FA 16:1   | 0.677 | 0.791 | 0.421 | -0.156 | 0.108  | -0.454 | No  |
| FA 17:0   | 0.168 | 0.003 | 0.632 | 0.264  | -0.378 | -0.123 | No  |
| FA 17:1   | 0.999 | 0.394 | 0.346 | 0.000  | -0.322 | -0.399 | No  |
| FA 18:0   | 0.094 | 0.932 | 0.453 | -0.197 | -0.011 | -0.079 | No  |
| FA 18:1   | 0.499 | 0.425 | 0.547 | -0.237 | -0.280 | -0.270 | No  |
| FA 18:2   | 0.186 | 0.285 | 0.266 | -0.377 | -0.259 | -0.473 | No  |
| FA 18:3   | 0.782 | 0.510 | 0.318 | -0.102 | -0.259 | -0.512 | No  |
| FA 18:3   | 0.322 | 0.940 | 0.145 | -0.295 | -0.020 | -0.579 | No  |
| FA 19:1   | 0.564 | 0.130 | 0.232 | -0.330 | -0.875 | -0.618 | No  |
| FA 20:0   | 0.029 | 0.016 | 0.825 | 0.159  | -0.148 | -0.022 | No  |
| FA 20:1   | 0.917 | 0.093 | 0.208 | 0.030  | -0.495 | -0.405 | No  |
| FA 20:2   | 0.994 | 0.604 | 0.035 | -0.001 | -0.115 | -0.667 | No  |
| FA 20:3   | 0.842 | 0.852 | 0.337 | 0.074  | 0.051  | -0.339 | No  |
| FA 20:4   | 0.050 | 0.375 | 0.019 | -0.410 | -0.110 | -0.397 | Yes |
| FA 20:4;O | 0.617 | 0.384 | 0.780 | 0.800  | -0.815 | 0.240  | No  |
| FA 20:5   | 0.957 | 0.349 | 0.010 | 0.018  | -0.272 | -1.002 | No  |
| FA 21:0   | 0.058 | 0.718 | 0.129 | 0.225  | 0.092  | 0.195  | No  |
| FA 22:0   | 0.163 | 0.700 | 0.732 | 0.165  | 0.040  | -0.039 | No  |
| FA 22:4   | 0.089 | 0.876 | 0.018 | -0.655 | -0.032 | -0.701 | No  |
| FA 22:5   | 0.303 | 0.252 | 0.014 | -0.490 | -0.260 | -0.750 | No  |
| FA 22:5   | 0.724 | 0.557 | 0.057 | -0.169 | -0.100 | -0.574 | No  |
| FA 22:6   | 0.238 | 0.278 | 0.148 | -0.380 | -0.230 | -0.292 | No  |
| FA 24:0   | 0.303 | 0.777 | 0.775 | 0.112  | -0.027 | 0.031  | No  |
| FA 24:1   | 0.237 | 0.076 | 0.813 | 0.384  | -0.352 | -0.069 | No  |
| FA 26:0   | 0.726 | 0.587 | 0.928 | 0.041  | 0.060  | 0.011  | No  |
| FA 26:1   | 0.194 | 0.240 | 0.787 | 0.680  | -0.759 | 0.146  | No  |
| FA 28:0   | 0.879 | 0.553 | 0.994 | 0.020  | 0.090  | -0.001 | No  |
| FA 28:7   | 0.143 | 0.624 | 0.608 | -0.303 | -0.132 | -0.170 | No  |

|                      |       |       |       |        |        |        |     |
|----------------------|-------|-------|-------|--------|--------|--------|-----|
| FA 30:0              | 0.786 | 0.549 | 0.728 | -0.034 | 0.095  | -0.059 | No  |
| HexCer 34:1;2O       | 0.225 | 0.633 | 0.373 | 0.490  | 0.146  | 0.316  | No  |
| HexCer 40:1;2O       | 0.109 | 0.118 | 0.123 | 0.424  | 0.357  | 0.462  | No  |
| HexCer 41:1;2O       | 0.686 | 0.800 | 0.143 | 0.146  | -0.077 | 0.521  | No  |
| HexCer 42:1;2O       | 0.455 | 0.895 | 0.503 | 0.153  | -0.026 | 0.158  | No  |
| HexCer 42:2;2O       | 0.370 | 0.344 | 0.177 | 0.348  | 0.373  | 0.447  | No  |
| LPC 14:0             | 0.217 | 0.298 | 0.270 | 1.440  | -1.324 | -0.397 | No  |
| LPC 14:0             | 0.057 | 0.101 | 0.145 | 0.578  | 0.436  | -0.267 | No  |
| LPC 15:0             | 0.478 | 0.418 | 0.938 | 0.203  | 0.142  | -0.019 | No  |
| LPC 16:0             | 0.506 | 0.199 | 0.424 | 0.105  | 0.197  | -0.064 | No  |
| LPC 16:0             | 0.597 | 0.156 | 0.313 | 0.084  | 0.212  | -0.082 | No  |
| LPC 16:1             | 0.084 | 0.254 | 0.581 | 0.326  | 0.214  | -0.101 | No  |
| LPC 17:0             | 0.482 | 0.935 | 0.248 | -0.187 | 0.011  | -0.218 | No  |
| LPC 17:1             | 0.497 | 0.621 | 0.950 | 0.395  | -0.238 | 0.024  | No  |
| LPC 18:0             | 0.090 | 0.752 | 0.045 | -0.313 | 0.040  | -0.328 | No  |
| LPC 18:0             | 0.078 | 0.913 | 0.028 | -0.314 | 0.011  | -0.308 | No  |
| LPC 18:1             | 0.518 | 0.157 | 0.410 | 0.102  | 0.178  | 0.105  | No  |
| LPC 18:1             | 0.458 | 0.175 | 0.995 | 0.114  | 0.160  | -0.001 | No  |
| LPC 18:2             | 0.505 | 0.125 | 0.972 | 0.171  | 0.197  | 0.005  | No  |
| LPC 18:2             | 0.610 | 0.113 | 0.858 | 0.136  | 0.238  | 0.026  | No  |
| LPC 18:3             | 0.371 | 0.025 | 0.573 | 0.353  | 0.704  | 0.178  | No  |
| LPC 19:0             | 0.182 | 0.149 | 0.106 | -0.550 | -0.288 | -0.391 | No  |
| LPC 20:0             | 0.449 | 0.463 | 0.181 | -0.277 | 0.114  | -0.270 | No  |
| LPC 20:1             | 0.288 | 0.061 | 0.266 | -0.345 | -0.249 | -0.227 | No  |
| LPC 20:2             | 0.941 | 0.262 | 0.299 | 0.026  | 0.310  | -0.249 | No  |
| LPC 20:3             | 0.031 | 0.129 | 0.237 | 0.629  | 0.498  | 0.267  | Yes |
| LPC 20:4             | 0.012 | 0.016 | 0.742 | -0.313 | 0.347  | 0.025  | Yes |
| LPC 20:4             | 0.010 | 0.015 | 0.880 | -0.328 | 0.366  | 0.014  | Yes |
| LPC 22:0             | 0.682 | 0.784 | 0.068 | 0.148  | -0.216 | -0.596 | No  |
| LPC 22:1             | 0.643 | 0.733 | 0.202 | -0.202 | 0.123  | -0.353 | No  |
| LPC 22:4             | 0.381 | 0.190 | 0.827 | 0.282  | 0.822  | -0.088 | No  |
| LPC 22:5             | 0.122 | 0.336 | 0.547 | 0.584  | 0.490  | -0.189 | No  |
| LPC 22:5             | 0.761 | 0.163 | 0.435 | 0.075  | 0.493  | -0.197 | No  |
| LPC 22:6             | 0.099 | 0.134 | 0.735 | -0.667 | 0.310  | 0.065  | No  |
| LPC 22:6             | 0.333 | 0.422 | 0.711 | -0.227 | 0.155  | 0.070  | No  |
| LPC 24:0             | 0.933 | 0.041 | 0.694 | 0.021  | -0.448 | -0.074 | No  |
| LPC 24:1             | 0.534 | 0.623 | 0.137 | 0.359  | -0.869 | -1.673 | No  |
| LPE 16:0             | 0.191 | 0.119 | 0.898 | 0.857  | 0.815  | -0.136 | No  |
| LPE 18:0             | 0.779 | 0.938 | 0.144 | -0.144 | -0.072 | 0.759  | No  |
| LPE 18:1             | 0.655 | 0.122 | 0.246 | 0.585  | 1.939  | 0.988  | No  |
| LPE 18:2             | 0.110 | 0.368 | 0.837 | 1.827  | -1.602 | 0.350  | No  |
| PC 30:0 PC 14:0_16:0 | 0.117 | 0.692 | 0.548 | 0.674  | 0.148  | -0.174 | No  |
| PC 31:0 PC 15:0_16:0 | 0.705 | 0.815 | 0.532 | 0.203  | 0.100  | -0.366 | No  |
| PC 32:0              | 0.291 | 0.063 | 0.027 | -0.711 | -1.197 | -1.505 | No  |
| PC 32:0 PC 16:0_16:0 | 0.323 | 0.957 | 0.862 | 0.380  | 0.019  | -0.041 | No  |
| PC 32:1 PC 16:0_16:1 | 0.019 | 0.821 | 0.995 | 1.012  | 0.048  | -0.002 | Yes |

|                      |       |       |       |        |        |        |     |
|----------------------|-------|-------|-------|--------|--------|--------|-----|
| PC 32:2 PC 14:0_18:2 | 0.008 | 0.343 | 0.947 | 1.000  | 0.258  | 0.016  | Yes |
| PC 33:0              | 0.061 | 0.965 | 0.967 | 0.418  | -0.012 | -0.012 | No  |
| PC 33:1 PC 15:0_18:1 | 0.006 | 0.590 | 0.505 | 1.056  | -0.099 | 0.196  | Yes |
| PC 33:2 PC 15:0_18:2 | 0.096 | 0.789 | 0.355 | 0.585  | -0.058 | 0.299  | No  |
| PC 34:0 PC 16:0_18:0 | 0.500 | 0.790 | 0.306 | 0.136  | 0.042  | 0.136  | No  |
| PC 34:1 PC 16:0_18:1 | 0.004 | 0.830 | 0.238 | 0.763  | 0.028  | 0.233  | Yes |
| PC 34:2 PC 16:0_18:2 | 0.015 | 0.578 | 0.359 | 0.444  | 0.072  | 0.174  | Yes |
| PC 34:3              | 0.215 | 0.424 | 0.813 | 0.487  | 0.161  | -0.091 | No  |
| PC 34:3 PC 16:1_18:2 | 0.001 | 0.735 | 0.956 | 0.849  | 0.052  | 0.014  | Yes |
| PC 34:4 PC 14:0_20:4 | 0.029 | 0.345 | 0.305 | 0.777  | 0.338  | -0.339 | Yes |
| PC 35:0              | 0.856 | 0.509 | 0.992 | -0.120 | -0.378 | 0.006  | No  |
| PC 35:1              | 0.001 | 0.641 | 0.261 | 0.835  | -0.081 | 0.250  | Yes |
| PC 35:2 PC 17:0_18:2 | 0.140 | 0.251 | 0.320 | 0.458  | -0.183 | 0.309  | No  |
| PC 35:3              | 0.198 | 0.201 | 0.836 | 0.628  | -0.394 | 0.097  | No  |
| PC 35:4              | 0.646 | 0.956 | 0.738 | 0.128  | -0.009 | -0.089 | No  |
| PC 36:0 PC 18:0_18:0 | 0.091 | 0.591 | 0.587 | -0.357 | 0.091  | -0.096 | No  |
| PC 36:1 PC 18:0_18:1 | 0.001 | 0.683 | 0.303 | 0.641  | -0.075 | 0.177  | Yes |
| PC 36:2 PC 18:0_18:2 | 0.019 | 0.663 | 0.393 | 0.463  | -0.050 | 0.137  | Yes |
| PC 36:2 PC 18:1_18:1 | 0.036 | 0.718 | 0.856 | 0.455  | -0.046 | 0.030  | Yes |
| PC 36:3 PC 16:0_20:3 | 0.000 | 0.083 | 0.575 | 1.075  | 0.754  | 0.162  | Yes |
| PC 36:3 PC 16:0_20:3 | 0.001 | 0.454 | 0.360 | 1.993  | 0.267  | 0.389  | Yes |
| PC 36:3 PC 16:0_20:3 | 0.011 | 0.153 | 0.792 | 0.950  | 0.289  | -0.084 | Yes |
| PC 36:3 PC 18:1_18:2 | 0.365 | 0.231 | 0.499 | 0.302  | -0.222 | 0.160  | No  |
| PC 36:4              | 0.751 | 0.731 | 0.397 | 0.065  | 0.056  | -0.187 | No  |
| PC 36:4              | 0.396 | 0.406 | 0.334 | 0.452  | -0.138 | 0.320  | No  |
| PC 36:4 PC 16:0_20:4 | 0.730 | 0.911 | 0.571 | 0.061  | -0.015 | -0.091 | No  |
| PC 36:4 PC 18:2_18:2 | 0.281 | 0.343 | 0.232 | 0.592  | -0.182 | 0.422  | No  |
| PC 36:5 PC 16:1_20:4 | 0.494 | 0.406 | 0.420 | 0.309  | 0.192  | -0.276 | No  |
| PC 36:6 PC 14:0_22:6 | 0.070 | 0.196 | 0.961 | 1.132  | 0.509  | -0.021 | No  |
| PC 37:1              | 0.163 | 0.318 | 0.909 | 0.636  | -0.555 | 0.050  | No  |
| PC 37:2 PC 19:0_18:2 | 0.579 | 0.122 | 0.392 | 0.199  | -0.405 | 0.239  | No  |
| PC 37:2 PC 19:0_18:2 | 0.866 | 0.183 | 0.182 | 0.100  | -0.838 | -0.442 | No  |
| PC 37:4              | 0.044 | 0.544 | 0.015 | -0.350 | -0.067 | -0.319 | Yes |
| PC 37:4 PC 17:0_20:4 | 0.357 | 0.123 | 0.330 | -0.300 | -0.243 | -0.198 | No  |
| PC 37:5              | 0.007 | 0.733 | 0.934 | 0.971  | 0.187  | -0.027 | Yes |
| PC 37:6 PC 15:0_22:6 | 0.232 | 0.525 | 0.187 | 0.433  | -0.199 | 0.381  | No  |
| PC 38:1              | 0.091 | 0.224 | 0.702 | 0.537  | -0.482 | -0.162 | No  |
| PC 38:2 PC 18:0_20:2 | 0.025 | 0.160 | 0.584 | 0.730  | -0.362 | 0.135  | Yes |
| PC 38:2 PC 20:0_18:2 | 0.038 | 0.480 | 0.756 | 0.975  | 0.238  | 0.157  | Yes |
| PC 38:3 PC 18:0_20:3 | 0.007 | 0.566 | 0.900 | 0.722  | 0.114  | 0.027  | Yes |
| PC 38:3 PC 18:0_20:3 | 0.047 | 0.480 | 0.198 | 0.765  | 0.139  | -0.311 | Yes |
| PC 38:4 PC 16:0_22:4 | 0.042 | 0.418 | 0.978 | 0.843  | 0.401  | 0.010  | Yes |
| PC 38:4 PC 18:0_20:4 | 0.072 | 0.131 | 0.076 | -0.342 | -0.173 | -0.263 | No  |
| PC 38:5 PC 16:0_22:5 | 0.429 | 0.752 | 0.503 | 0.325  | 0.093  | -0.175 | No  |
| PC 38:5 PC 16:0_22:5 | 0.043 | 0.694 | 0.809 | 1.063  | 0.174  | -0.078 | Yes |
| PC 38:5 PC 18:1_20:4 | 0.169 | 0.292 | 0.533 | -0.329 | -0.136 | -0.139 | No  |

|                          |       |       |       |        |        |        |     |
|--------------------------|-------|-------|-------|--------|--------|--------|-----|
| PC 38:6 PC 16:0_22:6     | 0.611 | 0.586 | 0.502 | 0.136  | -0.107 | 0.136  | No  |
| PC 38:6 PC 18:2_20:4     | 0.753 | 0.538 | 0.501 | 0.066  | 0.104  | 0.173  | No  |
| PC 38:7                  | 0.551 | 0.504 | 0.716 | 0.149  | 0.167  | -0.119 | No  |
| PC 39:5 PC 17:0_22:5     | 0.028 | 0.425 | 0.705 | 0.606  | -0.337 | -0.137 | Yes |
| PC 39:6 PC 17:0_22:6     | 0.911 | 0.072 | 0.963 | -0.038 | -0.342 | -0.011 | No  |
| PC 39:7                  | 0.139 | 0.200 | 0.118 | -0.462 | -0.283 | -0.333 | No  |
| PC 40:2                  | 0.125 | 0.123 | 0.491 | 0.809  | -0.928 | -0.312 | No  |
| PC 40:3                  | 0.002 | 0.538 | 0.473 | 2.076  | 0.270  | -0.298 | Yes |
| PC 40:4                  | 0.307 | 0.635 | 0.083 | -0.284 | -0.076 | -0.320 | No  |
| PC 40:4 PC 18:0_22:4     | 0.187 | 0.754 | 0.420 | 0.457  | 0.105  | -0.194 | No  |
| PC 40:4 PC 20:0_20:4     | 0.643 | 0.831 | 0.332 | 0.290  | -0.092 | -0.675 | No  |
| PC 40:5                  | 0.024 | 0.035 | 0.048 | -0.450 | -0.363 | -0.449 | Yes |
| PC 40:5 PC 18:0_22:5     | 0.102 | 0.525 | 0.054 | 0.774  | -0.182 | -0.411 | No  |
| PC 40:5 PC 18:0_22:5     | 0.553 | 0.267 | 0.046 | 0.147  | -0.159 | -0.357 | No  |
| PC 40:6 PC 18:0_22:6     | 0.652 | 0.083 | 0.156 | -0.122 | -0.384 | -0.147 | No  |
| PC 40:6 PC 20:2_20:4     | 0.017 | 0.691 | 0.234 | 0.507  | 0.182  | -0.445 | Yes |
| PC 40:7 PC 18:1_22:6     | 0.804 | 0.337 | 0.382 | -0.060 | -0.192 | 0.292  | No  |
| PC 40:8 PC 18:2_22:6     | 0.364 | 0.666 | 0.611 | 0.357  | -0.153 | 0.217  | No  |
| PC 40:8 PC 20:4_20:4     | 0.009 | 0.291 | 0.934 | -0.502 | 0.175  | -0.017 | Yes |
| PC 40:9                  | 0.453 | 0.010 | 0.850 | 0.954  | 2.252  | -0.291 | No  |
| PC 41:5                  | 0.375 | 0.083 | 0.099 | 0.699  | -0.621 | -0.748 | No  |
| PC 42:10 PC 20:4_22:6    | 0.183 | 0.930 | 0.640 | -0.374 | -0.027 | 0.154  | No  |
| PC 42:5                  | 0.928 | 0.270 | 0.442 | 0.031  | -0.512 | -0.292 | No  |
| PC 42:6 PC 18:0_24:6     | 0.075 | 0.795 | 0.402 | 1.272  | 0.190  | -0.390 | No  |
| PC 42:8                  | 0.180 | 0.530 | 0.856 | -0.575 | 0.312  | -0.089 | No  |
| PC 42:9 PC 20:4_22:5     | 0.207 | 0.631 | 0.767 | 0.734  | -0.315 | -0.106 | No  |
| PC O-32:0 PC O-16:0_16:0 | 0.603 | 0.596 | 0.972 | 0.144  | -0.141 | -0.008 | No  |
| PC O-32:1                | 0.712 | 0.221 | 0.285 | 0.080  | -0.235 | 0.247  | No  |
| PC O-32:1                | 0.884 | 0.812 | 0.438 | -0.080 | 0.095  | -0.401 | No  |
| PC O-34:0                | 0.362 | 0.993 | 0.595 | 0.442  | 0.005  | -0.308 | No  |
| PC O-34:1 PC O-18:1_16:0 | 0.296 | 0.772 | 0.597 | 0.240  | -0.054 | 0.100  | No  |
| PC O-34:2                | 0.160 | 0.914 | 0.712 | 0.379  | 0.026  | -0.068 | No  |
| PC O-34:3 PC O-16:1_18:2 | 0.780 | 0.233 | 0.790 | 0.130  | -1.478 | 0.116  | No  |
| PC O-36:3                | 0.248 | 0.739 | 0.504 | 0.335  | 0.116  | -0.196 | No  |
| PC O-36:3                | 0.121 | 0.691 | 0.753 | 1.159  | 0.197  | -0.162 | No  |
| PC O-36:4 PC O-16:0_20:4 | 0.346 | 0.935 | 0.726 | 0.202  | -0.012 | -0.074 | No  |
| PC O-36:5 PC O-16:1_20:4 | 0.779 | 0.203 | 0.539 | -0.055 | -0.253 | 0.130  | No  |
| PC O-38:4 PC O-16:0_22:4 | 0.194 | 0.640 | 0.245 | 0.296  | -0.060 | 0.204  | No  |
| PC O-38:4 PC O-18:0_20:4 | 0.217 | 0.724 | 0.582 | 0.267  | -0.052 | -0.117 | No  |
| PC O-38:5 PC O-16:1_22:4 | 0.444 | 0.378 | 0.679 | 0.473  | 0.382  | -0.249 | No  |
| PC O-38:5 PC O-18:1_20:4 | 0.427 | 0.437 | 0.806 | 0.167  | -0.113 | -0.054 | No  |
| PC O-38:6 PC O-16:0_22:6 | 0.437 | 0.596 | 0.488 | 0.325  | 0.098  | 0.206  | No  |
| PC O-38:6 PC O-18:2_20:4 | 0.340 | 0.169 | 0.777 | -0.450 | -0.562 | -0.115 | No  |
| PC O-38:7 PC O-16:1_22:6 | 0.081 | 0.554 | 0.399 | -0.936 | -0.280 | 0.304  | No  |
| PC O-39:10               | 0.004 | 0.772 | 0.497 | 0.975  | 0.063  | 0.182  | Yes |
| PC O-40:4 PC O-20:0_20:4 | 0.263 | 0.377 | 0.008 | 0.446  | -0.251 | -0.929 | No  |

|                          |       |       |       |        |        |        |     |
|--------------------------|-------|-------|-------|--------|--------|--------|-----|
| PC O-40:7 PC O-18:1_22:6 | 0.658 | 0.530 | 0.904 | 0.351  | -0.165 | 0.067  | No  |
| PC O-40:8                | 0.806 | 0.236 | 0.615 | 0.071  | -0.196 | -0.148 | No  |
| PC O-41:10               | 0.002 | 0.664 | 0.828 | 0.711  | -0.125 | -0.056 | Yes |
| PC O-41:11               | 0.077 | 0.713 | 0.480 | 0.552  | -0.089 | -0.168 | No  |
| PE 34:2 PE 16:0_18:2     | 0.041 | 0.478 | 0.169 | 2.594  | -0.752 | 0.851  | Yes |
| PE 36:2 PE 18:0_18:2     | 0.011 | 0.512 | 0.455 | 1.802  | -0.523 | 0.389  | Yes |
| PE 36:4 PE 16:0_20:4     | 0.066 | 0.758 | 0.907 | 1.059  | -0.125 | 0.046  | No  |
| PE 38:4 PE 18:0_20:4     | 0.085 | 0.782 | 0.703 | 0.768  | -0.136 | -0.109 | No  |
| PE 38:5 PE 18:1_20:4     | 0.258 | 0.652 | 0.279 | 1.362  | -0.303 | -0.655 | No  |
| PE 38:6 PE 16:0_22:6     | 0.131 | 0.449 | 0.632 | 1.385  | -0.468 | 0.276  | No  |
| PE 40:6 PE 18:0_22:6     | 0.586 | 0.227 | 0.952 | 0.162  | -0.412 | 0.016  | No  |
| PE O-36:5 PE O-16:1_20:4 | 0.668 | 0.569 | 0.365 | 0.261  | -0.232 | -0.340 | No  |
| PE O-38:5 PE O-18:1_20:4 | 0.287 | 0.591 | 0.104 | 0.541  | -0.204 | -0.499 | No  |
| PE O-38:6 PE O-18:2_20:4 | 0.266 | 0.398 | 0.361 | 1.106  | -0.529 | -0.518 | No  |
| PE P-36:4 PE P-16:0_20:4 | 0.855 | 0.820 | 0.128 | 0.141  | -0.105 | -0.882 | No  |
| PE P-38:5 PE P-18:1_20:4 | 0.757 | 0.749 | 0.301 | 0.281  | -0.166 | -0.716 | No  |
| PI 36:4                  | 0.456 | 0.418 | 0.380 | 0.219  | -0.214 | -0.255 | No  |
| PI 38:4 PI 18:0_20:4     | 0.470 | 0.025 | 0.009 | -0.228 | -0.421 | -0.667 | No  |
| SE 28:1/20:4             | 0.127 | 0.951 | 0.625 | -1.148 | -0.024 | -0.155 | No  |
| SE 29:1/20:4             | 0.082 | 0.945 | 0.506 | -0.859 | 0.028  | -0.264 | No  |
| SE 29:2/20:4             | 0.177 | 0.291 | 0.274 | 1.082  | -0.901 | -0.398 | No  |
| SM 32:1;2O               | 0.382 | 0.455 | 0.350 | 0.375  | 0.186  | -0.276 | No  |
| SM 33:1;2O               | 0.627 | 0.274 | 0.855 | 0.103  | -0.144 | -0.026 | No  |
| SM 34:0;2O               | 0.354 | 0.488 | 0.666 | 0.322  | 0.144  | -0.086 | No  |
| SM 34:1;2O               | 0.877 | 0.624 | 0.511 | 0.041  | 0.078  | 0.104  | No  |
| SM 34:1;3O               | 0.760 | 0.238 | 0.769 | -0.128 | -0.674 | -0.119 | No  |
| SM 34:2;2O               | 0.342 | 0.033 | 0.569 | -0.262 | -0.380 | -0.105 | No  |
| SM 34:2;3O               | 0.638 | 0.139 | 0.126 | 0.337  | -0.754 | -0.973 | No  |
| SM 35:1;2O               | 0.125 | 0.870 | 0.963 | 0.234  | -0.028 | 0.007  | No  |
| SM 36:1;2O               | 0.218 | 0.266 | 0.853 | 0.435  | 0.282  | 0.040  | No  |
| SM 36:2;2O               | 0.725 | 0.327 | 0.091 | 0.072  | -0.180 | -0.260 | No  |
| SM 38:1;2O               | 0.079 | 0.149 | 0.124 | 0.478  | 0.307  | 0.268  | No  |
| SM 39:1;2O               | 0.166 | 0.948 | 0.870 | 0.697  | -0.041 | -0.087 | No  |
| SM 40:1;2O               | 0.182 | 0.109 | 0.112 | 0.232  | 0.257  | 0.202  | No  |
| SM 40:2;2O               | 0.859 | 0.225 | 0.679 | 0.049  | -0.265 | 0.083  | No  |
| SM 40:2;2O               | 0.633 | 0.989 | 0.635 | 0.111  | -0.002 | 0.104  | No  |
| SM 41:1;2O               | 0.972 | 0.299 | 0.364 | -0.006 | -0.183 | 0.100  | No  |
| SM 41:2;2O               | 0.347 | 0.037 | 0.621 | -0.520 | -0.801 | -0.128 | No  |
| SM 41:2;2O               | 0.130 | 0.565 | 0.850 | 0.391  | 0.085  | -0.042 | No  |
| SM 42:1;2O               | 0.693 | 0.772 | 0.717 | -0.057 | -0.037 | 0.037  | No  |
| SM 42:2;2O               | 0.295 | 0.200 | 0.374 | 0.256  | 0.234  | 0.134  | No  |
| SM 42:2;2O               | 0.390 | 0.048 | 0.562 | -0.340 | -0.454 | -0.115 | No  |
| SM 42:3;2O               | 0.462 | 0.508 | 0.920 | 0.162  | 0.141  | 0.015  | No  |
| SM 43:1;2O               | 0.048 | 0.052 | 0.900 | -1.195 | -0.895 | 0.037  | Yes |
| SM 43:1;2O               | 0.832 | 0.330 | 0.495 | -0.059 | -0.270 | -0.222 | No  |
| SM 43:2;2O               | 0.691 | 0.009 | 0.857 | -0.285 | -1.840 | -0.166 | No  |

|                           |       |       |       |        |        |        |     |
|---------------------------|-------|-------|-------|--------|--------|--------|-----|
| ST 24:1;O4                | 0.042 | 0.589 | 0.016 | 1.768  | 0.255  | 1.536  | No  |
| ST 24:1;O4                | 0.318 | 0.430 | 0.583 | 0.792  | -0.611 | 0.446  | No  |
| ST 24:1;O4                | 0.556 | 0.149 | 0.142 | 0.667  | 0.598  | 1.455  | Yes |
| ST 27:1;O                 | 0.150 | 0.665 | 0.935 | 0.346  | -0.094 | 0.020  | No  |
| ST 27:1;O                 | 0.940 | 0.439 | 0.424 | -0.023 | -0.258 | -0.286 | No  |
| ST 27:1;O;S               | 0.651 | 0.226 | 0.516 | 0.112  | -0.334 | -0.167 | No  |
| ST 28:1;O;S               | 0.468 | 0.043 | 0.332 | -0.415 | -0.643 | -0.248 | No  |
| TG 42:1 TG 12:0_12:0_18:1 | 0.087 | 0.007 | 0.710 | 0.628  | 0.348  | 0.087  | No  |
| TG 44:0 TG 14:0_14:0_16:0 | 0.052 | 0.320 | 0.948 | 0.440  | -0.124 | 0.008  | No  |
| TG 44:1 TG 12:0_16:0_16:1 | 0.518 | 0.515 | 0.455 | -0.312 | 0.206  | -0.296 | No  |
| TG 44:1 TG 14:0_16:0_14:1 | 0.014 | 0.617 | 0.041 | 0.652  | 0.060  | -0.187 | Yes |
| TG 45:0 TG 14:0_15:0_16:0 | 0.377 | 0.900 | 0.686 | 0.089  | 0.008  | -0.044 | No  |
| TG 45:1 TG 14:0_15:0_16:1 | 0.328 | 0.600 | 0.778 | 0.119  | 0.070  | 0.023  | No  |
| TG 46:0 TG 14:0_16:0_16:0 | 0.018 | 0.761 | 0.578 | 0.677  | -0.042 | -0.131 | Yes |
| TG 46:1 TG 14:0_16:0_16:1 | 0.013 | 0.718 | 0.428 | 0.983  | 0.054  | -0.079 | Yes |
| TG 46:2 TG 12:0_16:0_18:2 | 0.005 | 0.410 | 0.194 | 0.553  | -0.130 | -0.284 | Yes |
| TG 46:3 TG 12:0_16:1_18:2 | 0.025 | 0.322 | 0.599 | 2.181  | 0.643  | -0.466 | Yes |
| TG 47:0 TG 15:0_16:0_16:0 | 0.003 | 0.273 | 0.917 | 0.474  | 0.092  | -0.013 | Yes |
| TG 47:1 TG 15:0_16:0_16:1 | 0.015 | 0.575 | 0.859 | 0.579  | -0.049 | 0.016  | Yes |
| TG 48:0 TG 16:0_16:0_16:0 | 0.002 | 0.857 | 0.678 | 0.977  | -0.035 | -0.094 | Yes |
| TG 48:1 TG 14:0_16:0_18:1 | 0.003 | 0.993 | 0.402 | 1.680  | 0.002  | -0.200 | Yes |
| TG 48:2 TG 14:0_16:0_18:2 | 0.006 | 0.601 | 0.411 | 1.856  | 0.184  | -0.286 | Yes |
| TG 48:4 TG 12:0_18:2_18:2 | 0.153 | 0.592 | 0.144 | 1.037  | 0.399  | -1.272 | No  |
| TG 49:0 TG 15:0_16:0_18:0 | 0.045 | 0.695 | 0.537 | 0.470  | 0.053  | 0.093  | Yes |
| TG 49:1 TG 15:0_16:0_18:1 | 0.003 | 0.842 | 0.929 | 1.245  | 0.039  | -0.020 | Yes |
| TG 49:2 TG 16:0_16:1_17:1 | 0.010 | 0.760 | 0.604 | 1.499  | 0.124  | 0.171  | Yes |
| TG 49:3 TG 15:0_16:1_18:2 | 0.022 | 0.651 | 0.606 | 1.423  | 0.202  | -0.181 | Yes |
| TG 50:0 TG 16:0_16:0_18:0 | 0.003 | 0.957 | 0.717 | 0.970  | -0.013 | -0.083 | Yes |
| TG 50:1 TG 16:0_16:0_18:1 | 0.002 | 0.871 | 0.574 | 1.718  | -0.062 | -0.224 | Yes |
| TG 50:2 TG 16:0_16:1_18:1 | 0.004 | 0.957 | 0.580 | 1.606  | 0.021  | -0.202 | Yes |
| TG 50:3 TG 16:0_16:1_18:2 | 0.009 | 0.908 | 0.362 | 1.408  | 0.042  | -0.336 | Yes |
| TG 50:4 TG 16:1_16:1_18:2 | 0.030 | 0.834 | 0.725 | 1.469  | 0.108  | -0.237 | Yes |
| TG 50:5 TG 16:0_16:1_18:4 | 0.043 | 0.425 | 0.199 | 1.280  | -0.240 | -0.512 | Yes |
| TG 51:0 TG 16:0_17:0_18:0 | 0.053 | 0.408 | 0.412 | 0.428  | 0.126  | 0.127  | No  |
| TG 51:1 TG 16:0_17:0_18:1 | 0.002 | 0.921 | 0.953 | 1.471  | -0.026 | -0.018 | Yes |
| TG 51:2 TG 16:0_17:1_18:1 | 0.006 | 0.924 | 0.985 | 1.438  | -0.027 | -0.006 | Yes |
| TG 51:3 TG 15:0_18:1_18:2 | 0.027 | 0.753 | 0.798 | 1.220  | -0.116 | -0.116 | Yes |
| TG 51:4 TG 15:0_18:2_18:2 | 0.039 | 0.880 | 0.937 | 1.002  | 0.076  | -0.049 | Yes |
| TG 52:0 TG 16:0_18:0_18:0 | 0.037 | 0.850 | 0.726 | 0.512  | 0.036  | 0.060  | Yes |
| TG 52:1 TG 16:0_18:0_18:1 | 0.002 | 0.949 | 0.998 | 1.925  | -0.022 | -0.001 | Yes |
| TG 52:2 TG 16:0_18:1_18:1 | 0.008 | 0.453 | 0.882 | 1.049  | -0.284 | 0.062  | Yes |
| TG 52:3 TG 16:0_18:1_18:2 | 0.059 | 0.561 | 0.835 | 0.686  | -0.183 | -0.078 | No  |
| TG 52:4 TG 16:0_18:2_18:2 | 0.078 | 0.591 | 0.731 | 0.868  | -0.207 | -0.156 | No  |
| TG 52:5 TG 16:0_18:2_18:3 | 0.062 | 0.851 | 0.559 | 0.908  | -0.072 | -0.253 | No  |
| TG 52:6 TG 16:1_18:2_18:3 | 0.046 | 0.672 | 0.101 | 0.900  | -0.118 | -0.748 | Yes |
| TG 53:1 TG 17:0_18:0_18:1 | 0.004 | 0.873 | 0.577 | 1.218  | -0.049 | 0.163  | Yes |

|                            |       |       |       |        |        |        |     |
|----------------------------|-------|-------|-------|--------|--------|--------|-----|
| TG 53:2 TG 17:0_18:1_18:1  | 0.007 | 0.658 | 0.817 | 1.294  | -0.127 | 0.087  | Yes |
| TG 53:3 TG 17:0_18:1_18:2  | 0.011 | 0.497 | 0.983 | 1.269  | -0.243 | 0.009  | Yes |
| TG 53:4 TG 17:1_18:1_18:2  | 0.005 | 0.947 | 0.888 | 1.199  | 0.021  | 0.055  | Yes |
| TG 53:5 TG 16:0_18:2_19:3  | 0.095 | 0.918 | 0.477 | 0.872  | -0.038 | -0.282 | No  |
| TG 53:6 TG 15:0_18:2_20:4  | 0.298 | 0.247 | 0.726 | 0.584  | -0.619 | -0.222 | No  |
| TG 54:0 TG 16:0_18:0_20:0  | 0.041 | 0.398 | 0.460 | 0.259  | 0.085  | 0.079  | No  |
| TG 54:2 TG 18:0_18:1_18:1  | 0.007 | 0.673 | 0.893 | 1.555  | -0.172 | -0.052 | Yes |
| TG 54:3 TG 18:0_18:1_18:2  | 0.016 | 0.685 | 0.931 | 1.136  | -0.185 | -0.038 | Yes |
| TG 54:4 TG 16:0_18:1_20:3  | 0.048 | 0.826 | 0.865 | 0.920  | -0.081 | -0.072 | Yes |
| TG 54:4 TG 18:1_18:1_18:2  | 0.006 | 0.585 | 0.777 | 1.187  | 0.145  | -0.095 | Yes |
| TG 54:5 TG 16:0_18:1_20:4  | 0.115 | 0.901 | 0.651 | 0.940  | -0.045 | -0.220 | No  |
| TG 54:6 TG 16:0_18:2_20:4  | 0.665 | 0.244 | 0.284 | 0.192  | -0.216 | -0.338 | No  |
| TG 54:7 TG 16:0_18:2_20:5  | 0.340 | 0.790 | 0.023 | 0.391  | -0.058 | -0.493 | No  |
| TG 54:7 TG 18:2_18:2_18:3  | 0.803 | 0.811 | 0.060 | 0.119  | -0.067 | -0.594 | No  |
| TG 55:0 TG 15:0_16:0_24:0  | 0.902 | 0.522 | 0.559 | -0.007 | 0.050  | 0.066  | No  |
| TG 55:2 TG 17:0_18:1_20:1  | 0.113 | 0.912 | 0.609 | 0.919  | 0.047  | 0.211  | No  |
| TG 55:3 TG 19:0_18:1_18:2  | 0.019 | 0.531 | 0.742 | 1.189  | -0.263 | 0.145  | Yes |
| TG 55:4 TG 17:0_18:1_20:3  | 0.029 | 0.598 | 0.747 | 1.095  | 0.309  | 0.198  | Yes |
| TG 55:5 TG 17:0_18:1_20:4  | 0.051 | 0.875 | 0.899 | 0.792  | 0.033  | 0.059  | No  |
| TG 55:6 TG 16:0_17:0_22:6  | 0.175 | 0.471 | 0.871 | 0.678  | -0.167 | -0.069 | No  |
| TG 56:0 TG 16:0_16:0_24:0  | 0.054 | 0.687 | 0.436 | 0.144  | 0.048  | 0.080  | No  |
| TG 56:1 TG 16:0_18:0_22:1  | 0.014 | 0.889 | 0.775 | 0.979  | 0.054  | 0.132  | Yes |
| TG 56:2 TG 16:0_22:0_18:2  | 0.005 | 0.935 | 0.725 | 1.644  | -0.043 | -0.177 | Yes |
| TG 56:3 TG 16:0_22:1_18:2  | 0.014 | 0.849 | 0.548 | 1.449  | 0.091  | 0.273  | Yes |
| TG 56:4 TG 16:0_18:1_22:3  | 0.014 | 0.989 | 0.725 | 1.295  | 0.006  | -0.167 | Yes |
| TG 56:5 TG 16:0_18:1_22:4  | 0.185 | 0.905 | 0.297 | 0.491  | -0.031 | -0.414 | No  |
| TG 56:6 TG 16:0_18:2_22:4  | 0.306 | 0.657 | 0.439 | 0.428  | -0.071 | -0.254 | No  |
| TG 56:7 TG 18:1_18:2_20:4  | 0.758 | 0.660 | 0.668 | 0.145  | 0.093  | -0.168 | No  |
| TG 56:8 TG 18:2_18:2_20:4  | 0.375 | 0.186 | 0.441 | -0.333 | -0.290 | -0.222 | No  |
| TG 56:9 TG 18:2_18:2_20:5  | 0.540 | 0.856 | 0.272 | -0.217 | -0.040 | -0.326 | No  |
| TG 56:9 TG 18:2_18:3_20:4  | 0.804 | 0.439 | 0.002 | 0.123  | -0.207 | -0.764 | No  |
| TG 57:0 TG 16:0_17:0_24:0  | 0.024 | 0.149 | 0.254 | -0.107 | 0.133  | 0.094  | No  |
| TG 57:1 TG 16:0_23:0_18:1  | 0.020 | 0.577 | 0.889 | 0.726  | -0.133 | 0.055  | Yes |
| TG 57:3 TG 18:1_18:1_21:1  | 0.023 | 0.622 | 0.510 | 1.316  | 0.397  | 0.477  | Yes |
| TG 57:5 TG 17:0_18:1_22:4  | 0.398 | 0.448 | 0.301 | 0.598  | -0.275 | -0.512 | No  |
| TG 57:7 TG 17:0_18:1_22:6  | 0.210 | 0.380 | 0.631 | 1.110  | -0.270 | -0.223 | No  |
| TG 58:0 TG 16:0_18:0_24:0  | 0.241 | 0.769 | 0.834 | 0.158  | 0.038  | -0.016 | No  |
| TG 58:1 TG 16:0_24:0_18:1  | 0.012 | 0.837 | 0.814 | 0.777  | -0.099 | 0.084  | Yes |
| TG 58:10 TG 18:2_18:2_22:6 | 0.123 | 0.360 | 0.060 | -1.091 | -0.337 | -0.566 | No  |
| TG 58:2 TG 16:0_18:1_24:1  | 0.026 | 0.657 | 0.831 | 1.161  | -0.256 | 0.118  | Yes |
| TG 58:3 TG 22:0_18:1_18:2  | 0.035 | 0.699 | 0.903 | 1.192  | -0.244 | 0.076  | Yes |
| TG 58:4 TG 18:1_22:1_18:2  | 0.098 | 0.714 | 0.827 | 1.083  | -0.227 | 0.168  | No  |
| TG 58:6 TG 18:0_18:1_22:5  | 0.096 | 0.745 | 0.753 | 2.379  | 0.119  | -0.168 | No  |
| TG 58:7 TG 18:1_18:1_22:5  | 0.702 | 0.101 | 0.990 | 0.171  | 0.385  | 0.004  | No  |
| TG 58:8 TG 18:1_18:2_22:5  | 0.842 | 0.496 | 0.299 | 0.094  | -0.188 | -0.258 | No  |
| TG 58:9 TG 18:2_20:3_20:4  | 0.439 | 0.669 | 0.058 | -0.462 | -0.151 | -0.463 | No  |



|                            |       |       |       |        |        |        |     |
|----------------------------|-------|-------|-------|--------|--------|--------|-----|
| TG 60:10 TG 18:1_20:4_22:5 | 0.664 | 0.923 | 0.695 | -0.285 | -0.025 | -0.120 | No  |
| TG 60:11 TG 18:2_20:4_22:5 | 0.185 | 0.508 | 0.406 | -0.991 | -0.155 | -0.225 | No  |
| TG 60:12 TG 18:2_20:4_22:6 | 0.343 | 0.247 | 0.013 | -0.858 | -0.456 | -0.649 | No  |
| TG 60:2 TG 16:0_20:1_24:1  | 0.030 | 0.848 | 0.705 | 1.090  | -0.129 | 0.235  | Yes |
| TG 60:3 TG 16:0_26:1_18:2  | 0.038 | 0.587 | 0.851 | 1.164  | -0.372 | 0.121  | Yes |
| TG 60:5 TG 24:1_18:2_18:2  | 0.026 | 0.802 | 0.685 | 1.700  | 0.242  | -0.217 | Yes |
| TG 60:9 TG 18:0_20:4_22:5  | 0.693 | 0.200 | 0.870 | -0.325 | 0.334  | -0.038 | No  |
| TG 60:9 TG 18:1_20:4_22:4  | 0.975 | 0.234 | 0.182 | 0.019  | -0.416 | -0.387 | No  |
| TG 62:13 TG 20:4_20:4_22:5 | 0.392 | 0.335 | 0.151 | -1.326 | -0.666 | -0.512 | No  |
| TG 62:14 TG 20:4_20:4_22:6 | 0.987 | 0.569 | 0.408 | -0.041 | -0.271 | -0.363 | No  |
| TG 62:2 TG 18:0_18:1_26:1  | 0.026 | 0.818 | 0.535 | 1.509  | -0.255 | 0.499  | Yes |
| TG 62:4 TG 18:1_26:1_18:2  | 0.046 | 0.615 | 0.464 | 1.349  | -0.561 | 0.806  | Yes |

**Table S4.** Enrichment analysis results for lipid classes and fatty acid residues.

| Class / Residue | Number of Features |           |           | <i>p</i> -Value |          | Enrichment Score |          |
|-----------------|--------------------|-----------|-----------|-----------------|----------|------------------|----------|
|                 | Total              | Increased | Decreased | Increase        | Decrease | Increase         | Decrease |
| FA 12:0         | 6                  | 0         | 0         | -               | -        | -                | -        |
| FA 14:0         | 16                 | 7         | 0         | 0.634461        | 1        | 0.973536         | 0        |
| FA 15:0         | 17                 | 8         | 0         | 0.524319        | 1        | 1.047165         | 0        |
| FA 16:0         | 82                 | 50        | 0         | 0.001069        | 1        | 1.356845         | 0        |
| FA 16:1         | 20                 | 14        | 0         | 0.019074        | 1        | 1.557658         | 0        |
| FA 17:0         | 18                 | 6         | 0         | 0.895631        | 1        | 0.741742         | 0        |
| FA 17:1         | 5                  | 0         | 0         | -               | -        | -                | -        |
| FA 18:0         | 39                 | 17        | 0         | 0.632847        | 1        | 0.96997          | 0        |
| FA 18:1         | 69                 | 40        | 0         | 0.013514        | 1        | 1.289986         | 0        |
| FA 18:2         | 76                 | 31        | 0         | 0.819999        | 1        | 0.907658         | 0        |
| FA 18:3         | 9                  | 1         | 0         | 0.995622        | 1        | 0.247247         | 0        |
| FA 20:0         | 5                  | 0         | 0         | -               | -        | -                | -        |
| FA 20:3         | 9                  | 7         | 0         | 0.047855        | 1        | 1.730731         | 0        |
| FA 20:4         | 51                 | 8         | 6         | 0.999999        | 5.93E-06 | 0.349055         | 8.302521 |
| FA 22:0         | 5                  | 0         | 0         | -               | -        | -                | -        |
| FA 22:4         | 10                 | 1         | 0         | 0.997626        | 1        | 0.222523         | 0        |
| FA 22:5         | 18                 | 3         | 1         | 0.997807        | 0.230062 | 0.370871         | 3.920635 |
| FA 22:6         | 22                 | 0         | 0         | 1               | 1        | 0                | 0        |
| FA 24:0         | 8                  | 0         | 0         | -               | -        | -                | -        |
| FA 24:1         | 9                  | 0         | 0         | -               | -        | -                | -        |
| CAR             | 4                  | 0         | 0         | -               | -        | -                | -        |
| CE              | 6                  | 0         | 2         | 1               | 0.011026 | 0                | 11.36364 |
| Cer             | 8                  | 1         | 0         | 0.903087        | 1        | 0.49867          | 0        |
| DG              | 38                 | 10        | 3         | 0.493366        | 0.308382 | 1.049832         | 1.794258 |
| FA              | 33                 | 0         | 1         | 1               | 0.642172 | 0                | 1.033058 |
| HexCer          | 5                  | 0         | 0         | -               | -        | -                | -        |
| LPC             | 31                 | 1         | 2         | 0.999916        | 0.228206 | 0.128689         | 2.199413 |
| LPE             | 4                  | 0         | 0         | -               | -        | -                | -        |
| PC              | 77                 | 24        | 3         | 0.108964        | 0.400539 | 1.243437         | 1.328217 |
| PC-O            | 24                 | 2         | 0         | 0.992612        | 1        | 0.332447         | 0        |
| PE              | 7                  | 2         | 0         | 0.558402        | 1        | 1.139818         | 0        |
| PE-O            | 3                  | 0         | 0         | -               | -        | -                | -        |
| PE-P            | 2                  | 0         | 0         | -               | -        | -                | -        |
| PI              | 2                  | 0         | 0         | -               | -        | -                | -        |
| SM              | 25                 | 0         | 1         | 1               | 0.536804 | 0                | 1.363636 |
| ST              | 7                  | 1         | 0         | 0.86984         | 1        | 0.569909         | 0        |
| TG              | 97                 | 53        | 0         | 8.87e-14        | 1        | 2.179754         | 0        |
